# Supplementary material for: Squaraines as near-infrared photocatalysts for organic reactions
Source: Royal Society of Chemistry journal article supplement (doi:10.1039/d2cc04707a), 2022-01-01

## Supporting Information

### Squaraines as Near-Infrared Photocatalysts for Organic Reactions

Nicolas Sellet, Malik Sebbat, Mourad Elhabiri, Morgan Cormier\* and

Jean-Philippe Goddard\*

*Université de Haute-Alsace (UHA), Université de Strasbourg (UNISTRA), CNRS, Laboratoire d'Innovation Moléculaire et Applications (LIMA) UMR 7042, 68100 Mulhouse, France*

#### Contents

|                                                                                                          |           |
|----------------------------------------------------------------------------------------------------------|-----------|
| <b>1. General methods</b> .....                                                                          | <b>2</b>  |
| <b>2. Properties of NIR-Photocatalysts</b> .....                                                         | <b>3</b>  |
| 2.1 Procedure for recording Absorption and Fluorescence spectra .....                                    | 3         |
| 2.2 Electrochemical measurements .....                                                                   | 7         |
| <b>3. Synthesis of starting materials</b> .....                                                          | <b>10</b> |
| 3.1 Synthesis of <i>N</i> -aryl-tetrahydroisoquinoline derivatives .....                                 | 10        |
| 3.2 Synthesis of (Benzoylmethylene)triphenylphosphorane .....                                            | 11        |
| 3.3 Synthesis of 1,1-bis(4-methoxyphenyl)ethene .....                                                    | 11        |
| <b>4. Near-Infrared Photoredox catalysis</b> .....                                                       | <b>12</b> |
| 4.1 Set-up .....                                                                                         | 12        |
| 4.2 Optimization Table of Aza-Henry reaction .....                                                       | 12        |
| 4.3 Aza-Henry: scope of substrat .....                                                                   | 17        |
| 4.4 Aza-Henry: scope of nucleophile.....                                                                 | 18        |
| 4.5 Other Near-Infrared Photoredox Catalysis .....                                                       | 20        |
| 4.6 Mechanistic study .....                                                                              | 22        |
| <b>5. <sup>1</sup>H, <sup>13</sup>C, <sup>19</sup>F and <sup>31</sup>P NMR spectra of products</b> ..... | <b>26</b> |

## 1. General methods

Unless otherwise stated, all the reagents are commercially available and were used without further purification. A newly opened commercial grade dry DMSO was used directly. Other solvents ( $\text{CH}_3\text{CN}$ , DCE,  $\text{CH}_3\text{NO}_2$ ) were distilled and stored under  $\text{N}_2$  in absence of light. Thin Layer Chromatography (TLC) was performed using Merck® silica gel 60 F254 Aluminum sheets. Column chromatography was performed using Merck® Geduran® Si 60 A° silica gel (0.040-0.063mm) or Fluka® neutral Aluminum oxide (CAS = 1344-28-1). Squaraines photocatalysts (Sq652, Sq660, Sq670, Sq687) were purchased from TCI or Merck.

The absorption and emission spectra were recorded using a Molecular Devices SpectraMax ID3 UV-Visible multimode microplate reader.

IR spectra were recorded on a Perkin Elmer Spectrum Two spectrometer equipped with a detector type (DTGS t) with a resolution of  $0.5\text{ cm}^{-1}$ .

Liquid state  $^1\text{H}$  and  $^{13}\text{C}$  NMR spectra were recorded at 400.16 and 100.62 MHz respectively on a Bruker 400 spectrometer or at 500 MHz and 126 MHz on a Bruker 500 spectrometer. All spectra are reported in  $\delta$  (ppm) relative to TMS, with  $\text{CDCl}_3$  as solvent.  $^1\text{H}$  NMR splitting patterns are designated as singlet (s), doublet (d), triplet (t), quadruplet (q), doublet of doublets (dd), doublets of triplet (dt) or m (multiplets). All the photocatalytic reactions were conducted using the following NIR-LED from Thorlabs:

- M660L4, light-emitting diode (LED, nominal wavelength: 660 nm, output power: 1050 mW, irradiance:  $20.9\ \mu\text{W}/\text{mm}^2$ ).
- M810L4 light-emitting diode (LED, nominal wavelength: 810 nm, output power: 542 mW, irradiance:  $23.7\ \mu\text{W}/\text{mm}^2$ ).

### Emission spectra of NIR-LED and red-LED<sup>1</sup>

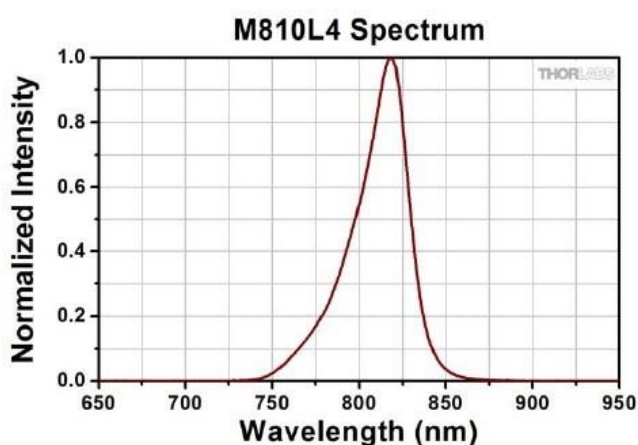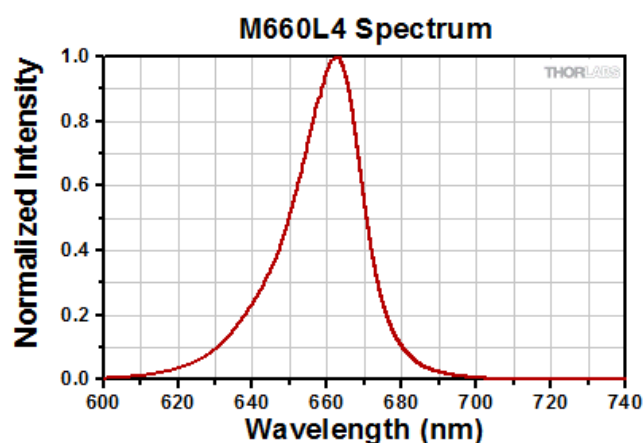

<sup>1</sup> Spectra and data sheets are available on the Thorlab's website : <https://www.thorlabs.com>

## 2. Properties of NIR-Photocatalysts

### 2.1 Procedure for recording Absorption and Fluorescence spectra

Absorbance and fluorescence spectra of NIR-photocatalysts (Sq687, Sq670, Sq660 and Sq652) were recorded in DMSO (at 20  $\mu\text{M}$ ) using a SpectraMax ID3 spectrometer at ambient temperature (20°C). For fluorescence spectra acquisition,  $\lambda_{\text{exc}}$  was set 20 nm less than the  $\lambda_{\text{max}}$  absorption of the corresponding photocatalyst.

#### **2,4-Bis[4-(*N,N*-diisobutylamino)-2,6-dihydroxyphenyl] squaraine (Sq652)**

**Chemical Formula :**  $\text{C}_{32}\text{H}_{44}\text{N}_2\text{O}_6$  **Molecular Weight:** 552.70 g/mol **CAS:** / **Merk ID:** 758337

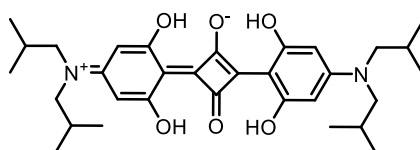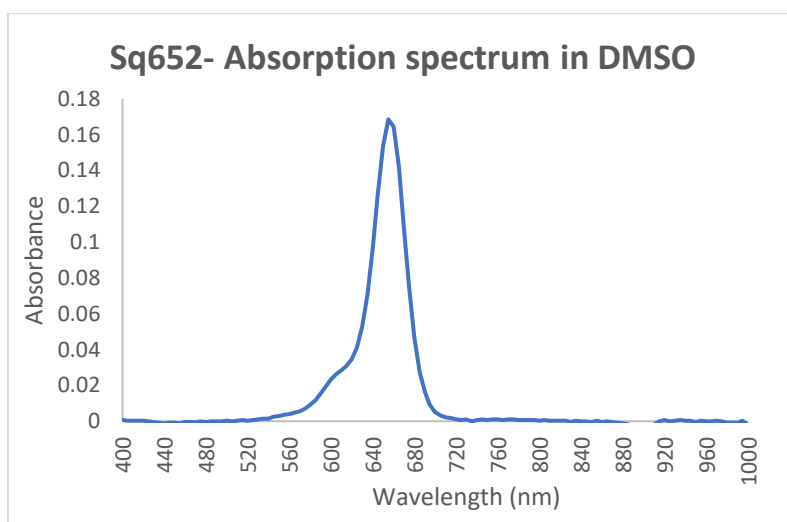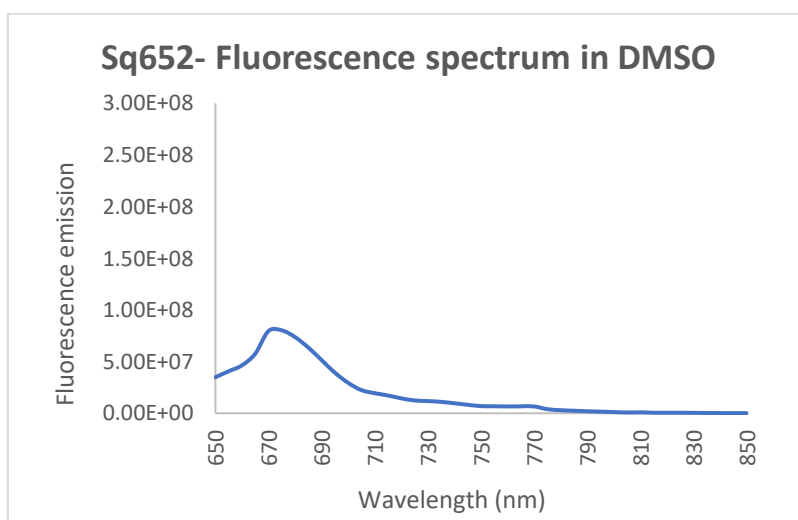

**2,4-Bis[4-(diethylamino)-2-hydroxyphenyl] squaraine (Sq660)**

**Chemical Formula :** C<sub>24</sub>H<sub>28</sub>N<sub>2</sub>O<sub>4</sub> **Molecular Weight:** 408.50 g/mol **CAS:** 68842-66-0 **TCI ID:** B4342

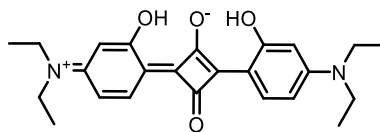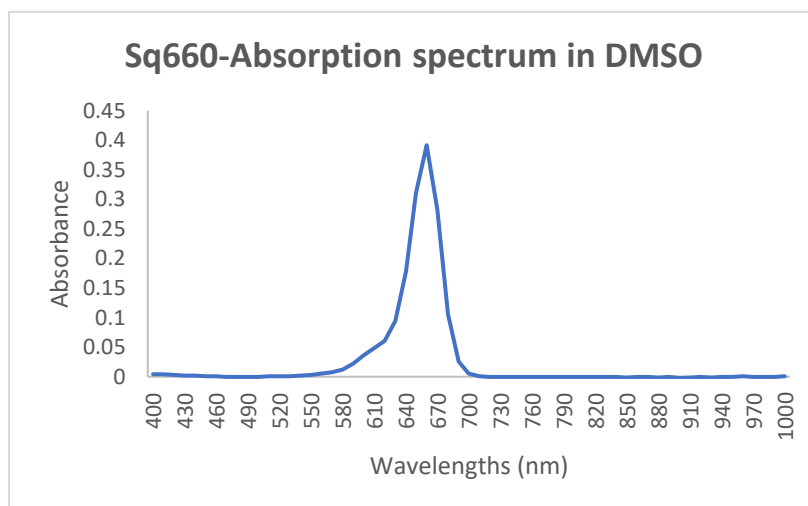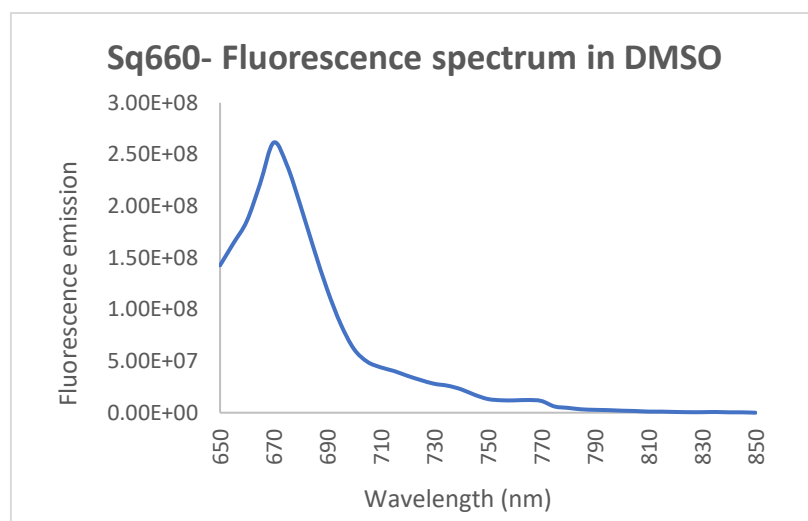

**2,4-Bis[4-(N,N-diphenylamino)-2,6-dihydroxyphenyl] squaraine (Sq670)**

**Chemical Formula :** C<sub>40</sub>H<sub>28</sub>N<sub>2</sub>O<sub>6</sub> **Molecular Weight:** 632.66 g/mol **CAS:** 1345272-10-7 **Merk ID:** 757233

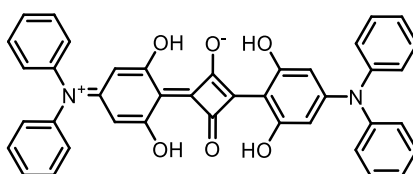

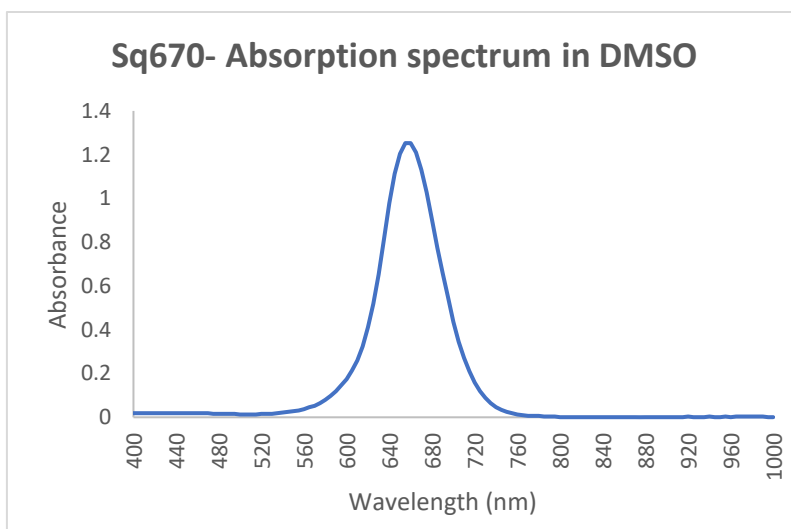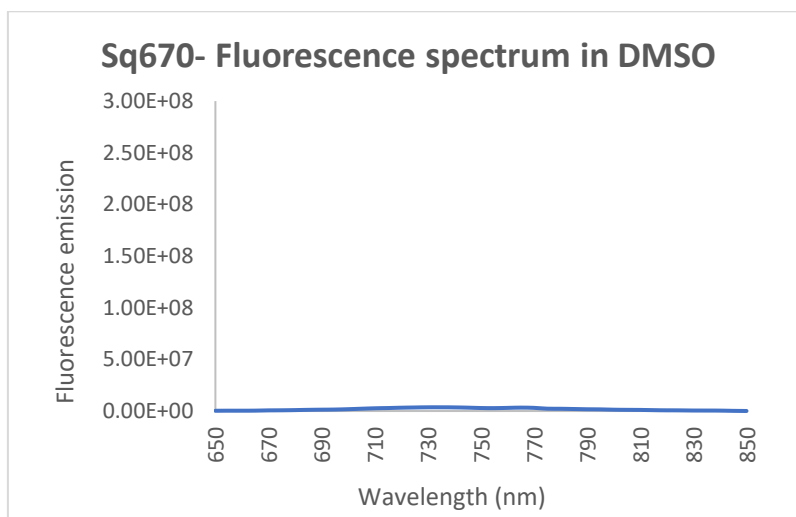

**2,4-Bis[8-hydroxy-1,1,7,7-tetramethyljulolidin-9-yl] squaraine (Sq687)**

**Chemical Formula :** C<sub>36</sub>H<sub>44</sub>N<sub>2</sub>O<sub>4</sub> **Molecular Weight:** 568.76 g/mol **CAS:** 358727-55-6 **TCI ID:** B4649

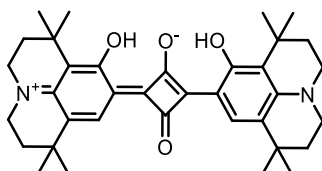

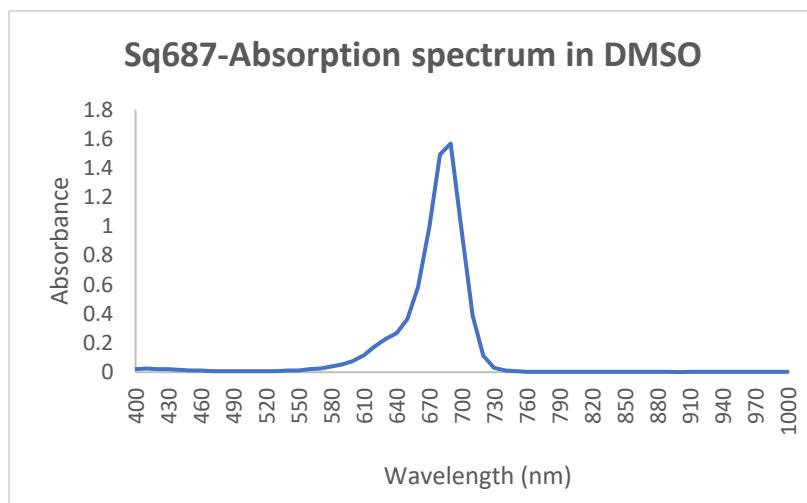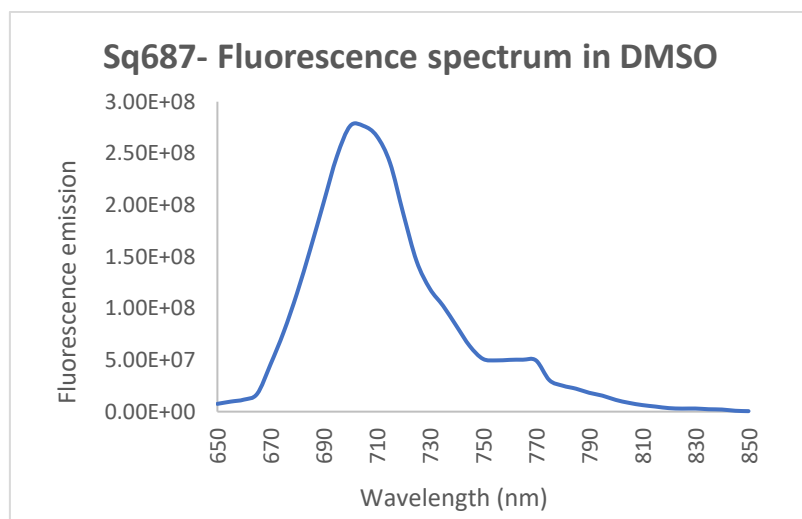

**Absorbance of 2,4-Bis[8-hydroxy-1,1,7,7-tetramethyljulolidin-9-yl]squaraine (Sq687) in different solvents**

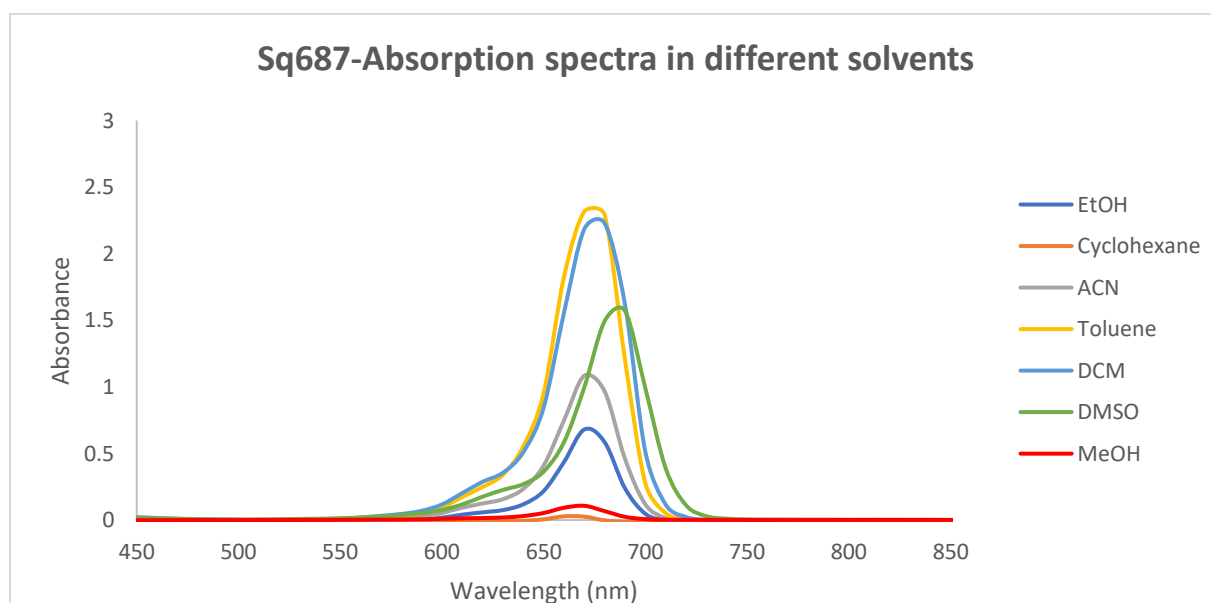

## 2.2 Electrochemical measurements

The electrochemical studies were carried out using a Voltalab 50 potentiostat/galvanostat (Radiometer Analytical MDE15 polarographic stand, PST050 analytical voltammetry and CTV101 speed control unit) controlled by the Voltmaster 4 electrochemical software. The cyclic voltammetry experiments were recorded using a conventional three-electrode cell (10 mL) with a glassy carbon disk (GC,  $s = 0.07 \text{ cm}^2$ ) set into a Teflon rotating tube as a working electrode, a Pt wire as a counter electrode and KCl(3 M)/Ag/AgCl reference electrode (+210 mV vs NHE and -34 mV vs SCE).<sup>2</sup> Prior to each measurement, the surface of the GC electrode was carefully polished with  $0.3 \mu\text{m}$  aluminium oxide suspension (ESCIL) on a silicon carbide abrasive sheet of grit 800/2400. The GC electrode was then copiously washed with water and dried with paper towel. All experiments were performed under ambient conditions at  $20^\circ\text{C} \pm 2^\circ\text{C}$ . The PCat solutions (concentration of  $\sim 1 \text{ mM}$ ) were prepared in DMSO with 100 mM of tetra-*n*-butylammonium hexafluorophosphate (*n*-Bu<sub>4</sub>PF<sub>6</sub>) as supporting and inert electrolyte. The solutions containing the PCat were stirred and purged (bubbling) with O<sub>2</sub>-free (Sigma Oxiclear cartridge) argon for 10 minutes before the voltammetry experiment was initiated, and maintained under an argon atmosphere during the measurement procedure. The voltage sweep rate was varied from 50 to 300 mV s<sup>-1</sup> and several cyclic voltammograms were recorded. Peak potentials were measured at a scan rate of 100 mV s<sup>-1</sup> unless otherwise indicated. According to the Rehm-Weller theory<sup>3</sup>, the singlet excited-state redox potentials of each squaraines dyes were estimated from the long wavelength tail ( $\lambda_{\text{tail}}$ ) of the absorption band lying at lower energies and from the ground-state redox potentials determined by CV.

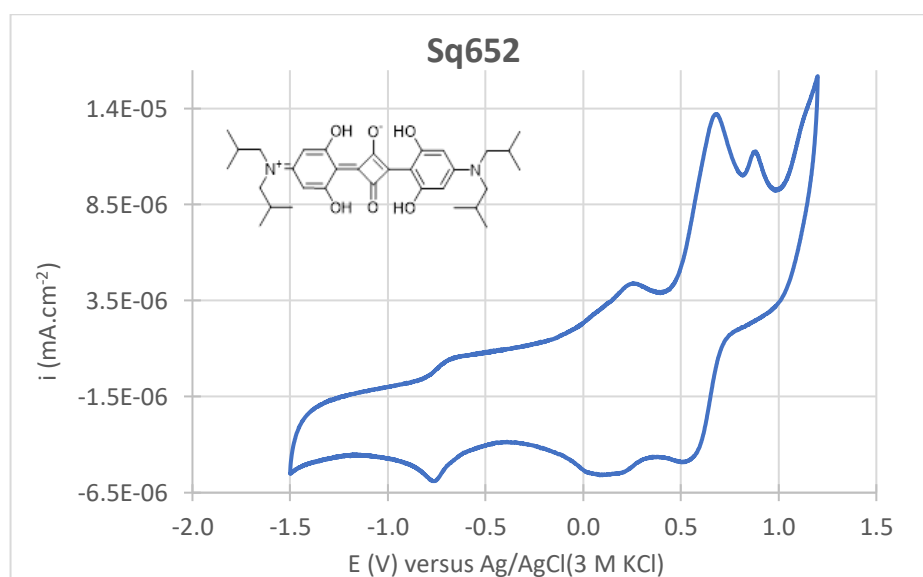

CV profile of **SQ652** (1 mM) measured in DMSO with 0.1 M *n*-Bu<sub>4</sub>PF<sub>6</sub> electrolyte support at room temperature (20°C).  $\nu = 100 \text{ mV s}^{-1}$ ; reference electrode = KCl(3 M)/Ag/AgCl; working electrode = glassy carbon disk of 0.07 cm<sup>2</sup> area; counter electrode = Pt wire.

<sup>2</sup> a) D. T. Sawyer, A. Sobkowiak, J. L. Roberts, *Electrochemistry for Chemists*, Wiley, **1995**. B) M. Song, K. E. Daniels, A. Kiani, S. Rashid-Nadimi, M. D. Dickey *Adv. Intell. Syst.* **2021**, 2100024.

<sup>3</sup> L. Buzzetti, G. E. M. Crisenza, P. Melchiorre *Angew.Chem.Int.Ed.* **2019**, 58, 3730–3747.

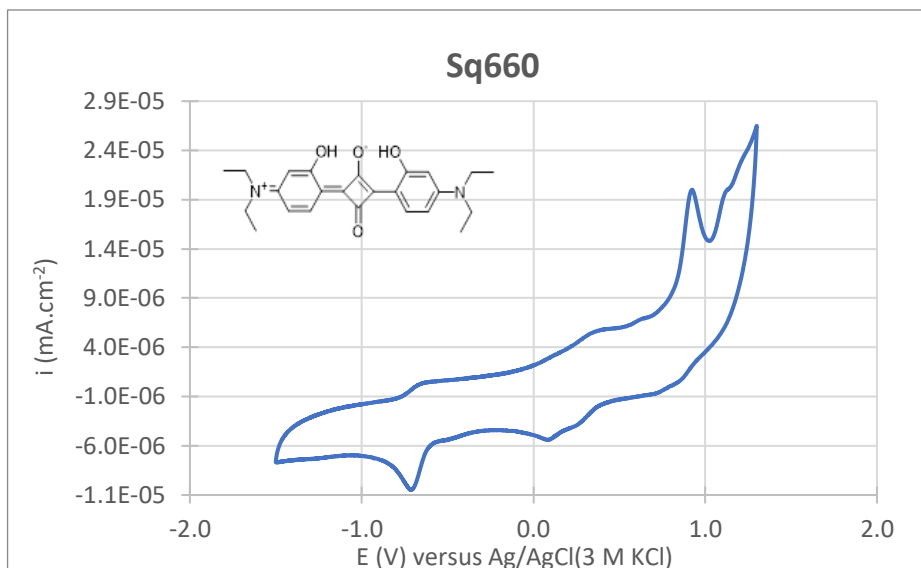

CV profile of **SQ660** (1 mM) measured in DMSO with 0.1 M  $n\text{-Bu}_4\text{PF}_6$  electrolyte support at room temperature (20°C).  $\nu = 100 \text{ mV s}^{-1}$ ; reference electrode = KCl(3 M)/Ag/AgCl; working electrode = glassy carbon disk of 0.07 cm<sup>2</sup> area; counter electrode = Pt wire.

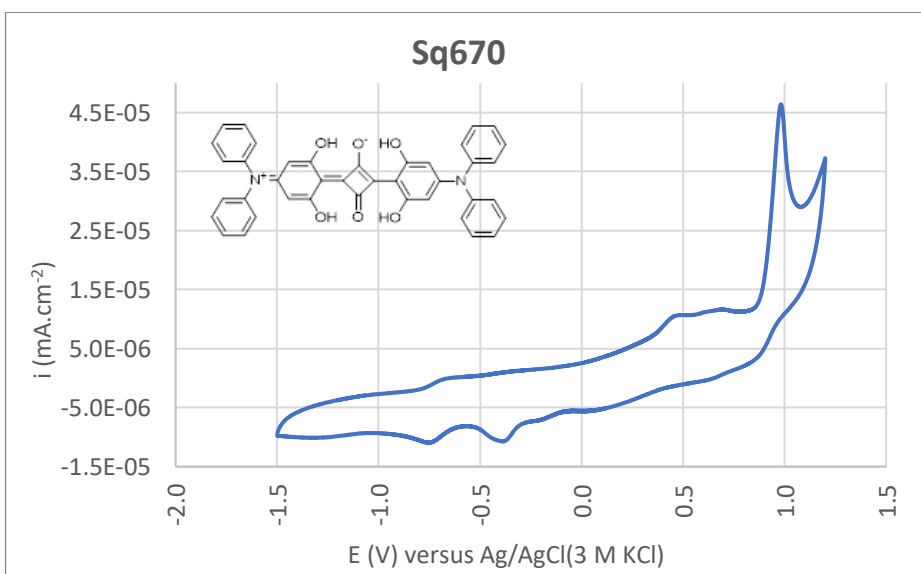

CV profile of **SQ670** (1 mM) measured in DMSO with 0.1 M  $n\text{-Bu}_4\text{PF}_6$  electrolyte support at room temperature (20°C).  $\nu = 100 \text{ mV s}^{-1}$ ; reference electrode = KCl(3 M)/Ag/AgCl; working electrode = glassy carbon disk of 0.07 cm<sup>2</sup> area; counter electrode = Pt wire.



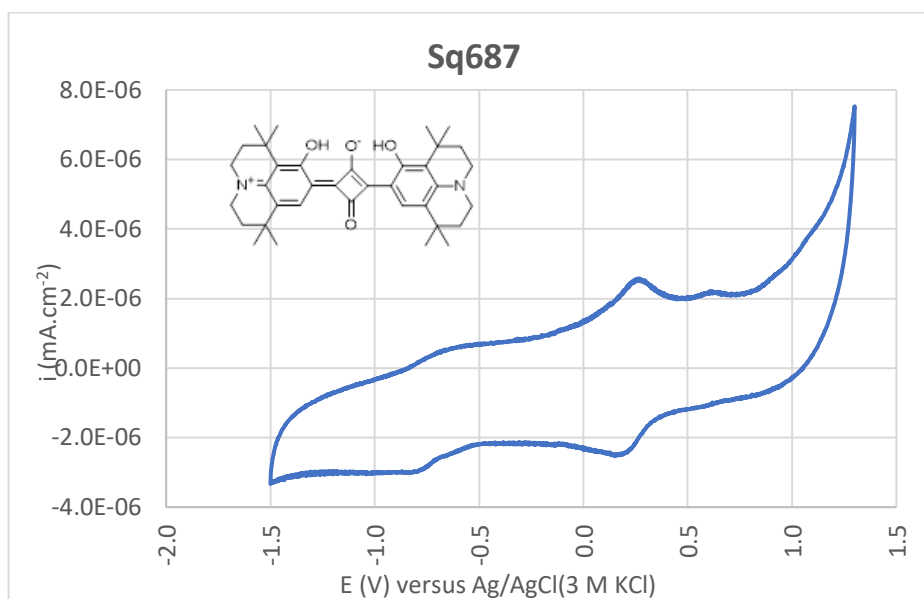

CV profile of **Sq687** (1 mM) measured in DMSO with 0.1 M *n*-Bu<sub>4</sub>PF<sub>6</sub> electrolyte support at room temperature (20°C).  $\nu = 100 \text{ mV s}^{-1}$ ; reference electrode = KCl(3 M)/Ag/AgCl; working electrode = glassy carbon disk of 0.07 cm<sup>2</sup> area; counter electrode = Pt wire.

**Table :  $E_{\text{red/ox}}$  of different squaraines measured by cyclic voltammetry (CV) with Ag/AgCl(3M KCl) reference electrode and then corrected<sup>2,4</sup> for referencing against SCE.**

| Pcat         | Measured vs Ag/AgCl |                      | Referenced to SCE   |                      | $E^*_{\text{red/ox}}$ calculated |                        |
|--------------|---------------------|----------------------|---------------------|----------------------|----------------------------------|------------------------|
|              | $E_{\text{ox}}$ (V) | $E_{\text{red}}$ (V) | $E_{\text{ox}}$ (V) | $E_{\text{red}}$ (V) | $E^*_{\text{ox}}$ (V)            | $E^*_{\text{red}}$ (V) |
| <b>Sq652</b> | 0.26                | -0.76                | 0.23                | -0.80                | -1.58                            | 1.01                   |
| <b>Sq660</b> | 0.39                | -0.71                | 0.36                | -0.75                | -1.44                            | 1.05                   |
| <b>Sq670</b> | 0.46                | -0.39                | 0.43                | -0.43                | -1.22                            | 1.22                   |
| <b>Sq687</b> | 0.26                | -0.80                | 0.23                | -0.83                | -1.45                            | 0.84                   |

<sup>4</sup> E. P. Friis, J. E. T. Anderson, L. L. Madsen, N. Bonander, P. Moller, J. Ulstrup *Electrochimica Acta* **1998**, *43*, 1114-1122.

### 3. Synthesis of starting materials

#### 3.1 Synthesis of *N*-aryl-tetrahydroisoquinoline derivatives

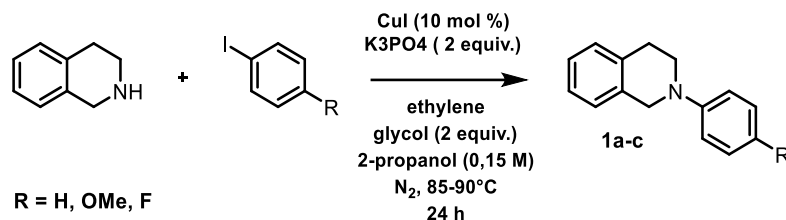

**General procedure :** The substrates **1a-c** were synthesized according to established procedure<sup>5</sup>: Copper(I) iodide (200 mg, 1.05 mmol, 10 mol%) and potassium phosphate (4.25 g, 20.0 mmol, 2 equiv.) were put into a Schlenk tube. The tube was evacuated and back filled with nitrogen. 2-Propanol (10.0 mL), ethylene glycol (1.11 mL, 20.0 mmol, 2 equiv.), 1,2,3,4-tetrahydroisoquinoline (2.0 mL, 15 mmol, 1.5 equiv.) and iodoarene (10.0 mmol, 1 equiv.) were added successively at room temperature. The reaction mixture was heated at 85–90 °C and kept for 24 h and then allowed to cool to room temperature. Diethyl ether (20 mL) and water (20 mL) were then added to the reaction mixture. The organic layer was extracted by diethyl ether (2 × 20 mL). The combined organic phases were washed with brine and dried over magnesium sulfate. The solvent was removed by rotary evaporation and purified by column chromatography on silica gel (petroleum ether to petroleum ether : EtOAc= 95 :5) to give the pure products **1a-c**.

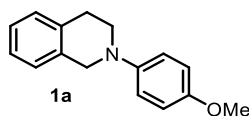

**2-(4-methoxyphenyl)-1,2,3,4-tetrahydroisoquinoline 1a :** Following the general procedure, **1a** is obtained as a white solid (m= 2 g, yield= 56%). Data are conformed to the literature.<sup>4</sup>  $R_f$ = 0.35 (petroleum ether : EtOAc= 95 :5). <sup>1</sup>H NMR (400 MHz, CDCl<sub>3</sub>) δ 7.21 – 7.13 (m, 4H), 7.01-6.98 (dt,  $J$ = 9.1, 3.6 Hz, 2H), 6.90-6.86 (dt,  $J$ = 9.1, 3.7 Hz, 2H), 4.31 (s, 2H), 3.79 (s, 3H), 3.46 (t,  $J$ = 5.8 Hz, 2H), 3.00 (t,  $J$ = 5.8 Hz, 2H). <sup>13</sup>C NMR (126 MHz, CDCl<sub>3</sub>) δ 153.6, 145.5, 134.7, 134.6, 128.8, 126.7, 126.4, 126.0, 118.2 (2C), 114.7 (2C), 55.8, 52.8, 48.6, 29.2. FT-IR (ν/cm<sup>-1</sup>, neat) : 3037, 2996, 2959, 2918, 2897, 2751, 1630, 1583, 1272, 822, 754.

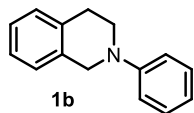

**2-phenyl-1,2,3,4-tetrahydroisoquinoline 1b :** Following the general procedure, **1b** is obtained as a light yellow oil (m= 2.1 g, yield= 63 %). Data are conformed to the literature.<sup>4</sup>  $R_f$ = 0.45 (petroleum ether : EtOAc= 95 :5). <sup>1</sup>H NMR (400 MHz, CDCl<sub>3</sub>) δ 7.34 – 7.30 (m, 2H), 7.24 – 7.16 (m, 4H), 7.02-7.00 (m, 2H), 6.87-6.84 (tt,  $J$ = 7.3, 1.0 Hz, 1H), 4.44 (s, 2H), 3.59 (t,  $J$ = 5.9 Hz, 2H), 3.01 (t,  $J$ = 5.9 Hz, 2H). <sup>13</sup>C NMR (126 MHz, CDCl<sub>3</sub>) δ 150.7, 135.0, 134.6, 129.3 (2C), 128.7, 126.7, 126.5, 126.2, 118.8, 115.3 (2C), 50.9, 46.7, 29.3. FT-IR (ν/cm<sup>-1</sup>, neat) : 3041, 2986, 2969, 2930, 2895, 2752, 1630, 1583, 810, 748.

<sup>5</sup> Z. Li, C.-J. Li, *J. Am. Chem. Soc.* **2005**, *127*, 6968-6969

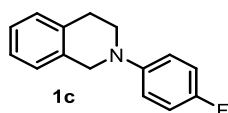

**2-(4-fluorophenyl)-1,2,3,4-tetrahydroisoquinoline 1c**: Following the general procedure, **1c** is obtained as a white solid ( $m = 1.27\text{ g}$ , yield = 37%). Data are conformed to the literature.<sup>6</sup>  $R_f = 0.50$  (petroleum ether : EtOAc = 95 : 5).  $^1\text{H NMR}$  (400 MHz,  $\text{CDCl}_3$ )  $\delta$  7.23 – 7.15 (m, 4H), 7.03 – 6.98 (m, 2H), 6.97-6.93 (m, 2H), 4.35 (s, 2H), 3.50 (t,  $J = 5.9$  Hz, 2H), 3.00 (t,  $J = 5.9$  Hz, 2H).  $^{13}\text{C NMR}$  (126 MHz,  $\text{CDCl}_3$ )  $\delta$  156.8 (d,  $J = 238$  Hz), 147.5 (d,  $J = 2$  Hz), 134.7, 134.4, 128.8, 126.6, 126.5, 126.2, 117.3, 117.2, 115.8, 115.6, 52.0, 47.9, 29.2.  $^{19}\text{F NMR}$  (376 MHz,  $\text{CDCl}_3$ )  $\delta$  -125.6. **FT-IR** ( $\nu/\text{cm}^{-1}$ , neat) : 2994, 2926, 2825, 1606, 1591, 1205, 808, 742.

### 3.2 Synthesis of 1,1-bis(4-methoxyphenyl)ethene 10

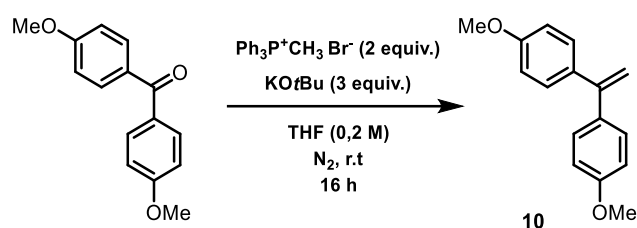

Methyltriphenylphosphonium bromide (2.1 g, 6 mmol, 3 equiv.) was suspended in dry THF (10 mL, 0.2 M) at 0 °C. KOtBu (672 mg, 6 mmol, 3 equiv.) was added to the suspension and a bright yellow color was observed. The mixture was stirred at 0 °C for 30 min. Then 4, 4'-Dimethoxybenzophenone (484 mg, 2 mmol, 1 equiv.) was added and the reaction mixture was stirred at 0 °C to rt for 16 h. The reaction was quenched with  $\text{H}_2\text{O}$  (10 mL) and extracted with diethyl ether (4 x 6 mL). The combined organic layers were dried over  $\text{Na}_2\text{SO}_4$ , filtered, and concentrated *in vacuo* to give crude alkene **19**. The crude was purified by column chromatography on silica gel (cyclohexane : EtOAc = 8 : 2) to afford 1,1-bis(4-methoxyphenyl)ethene **19** ( $m = 475$  mg, yield = 99%) as a white solid. Data are conformed to the literature<sup>7</sup>.  $R_f = 0.83$  (cyclohexane : EtOAc = 8 : 2).  $^1\text{H NMR}$  (400 MHz,  $\text{CDCl}_3$ )  $\delta$  7.30-7.26 (dt,  $J = 8.8, 2.9$  Hz, 4H), 6.89-6.85 (dt,  $J = 8.8, 2.9$  Hz, 4H), 5.30 (s, 2H), 3.83 (s, 6H).  $^{13}\text{C NMR}$  (126 MHz,  $\text{CDCl}_3$ )  $\delta$  159.5 (2C), 149.1, 134.5 (2C), 129.6 (4C), 113.6 (4C), 111.8, 55.4 (2C). **FT-IR** ( $\nu/\text{cm}^{-1}$ , neat) : 2930, 2894, 2761, 1653, 1603, 838, 827.

### 3.3 Synthesis of (Benzoylmethylene)triphenylphosphorane 8

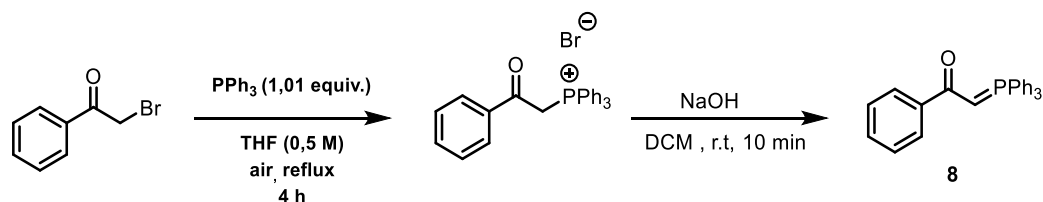

<sup>6</sup> S.M. Soria-Castro, B. Lebeau, M. Cormier, S. Neunlist, T. J. Daou, J.-P. Goddard *Eur. J. Org. Chem.* **2020**, 1572–1578

<sup>7</sup> T. W. Liwosz, S.R. Chemler, *Chem. Eur. J.* **2013**, *19*, 12771–12777

A solution of  $\text{PPh}_3$  (1.7 g, 6.4 mmol, 1.01 equiv) and  $\alpha$ -bromoacetophenone (1.27 g, 6.3 mmol, 1 equiv) in 13 mL THF was heated under reflux and stirred for 4 hours. Then, the reaction mixture was cooled to room temperature and the crude phosphonium bromide was filtered and washed with THF (3  $\times$  20 mL). Then, the phosphonium was dissolved in 25 mL of  $\text{CH}_2\text{Cl}_2$  and aqueous NaOH (20 wt %, 25 mL) were added, and the mixture was stirred for 10 minutes. The organic phase was separated, and the aqueous phase was extracted with  $\text{CH}_2\text{Cl}_2$  (3  $\times$  10 mL). The combined organic phases were dried over anhydrous  $\text{MgSO}_4$ , filtered, and concentrated under reduced pressure to give the corresponding phosphonium ylide **8** (1.62g, 66% yield). Data are conformed to the literature<sup>8</sup>.  $^1\text{H NMR}$  (500 MHz,  $\text{CDCl}_3$ )  $\delta$  7.99-7.97 (m, 2H), 7.75-7.66 (m, 6H), 7.58-7.54 (m, 3H), 7.49-7.45 (m, 6H), 7.37-7.33 (m, 3H), 4.43 (d,  $J$  = 24.5 Hz, 1H).  $^{13}\text{C NMR}$  (126 MHz,  $\text{CDCl}_3$ ) ( $J$  P-C)  $\delta$  185.0 (d,  $J$  = 3.6 Hz, C=O), 141.4 (d,  $J$  = 14.7 Hz), 133.3 (d,  $J$  = 10.2 Hz, C2 of P-Ph), 132.2 (d,  $J$  = 2.8 Hz, C4 of P-Ph) 129.5 (2C), 129.0 (d,  $J$  = 12.7 Hz, C3 of P-Ph), 127.9, 127.6 (d,  $J$  = 91.3 Hz, C1 of P-Ph) 127.0, 51.2 (d,  $J$  = 112.1 Hz, P=C).  $^{31}\text{P NMR}$  (203 MHz,  $\text{CDCl}_3$ )  $\delta$  16.6. **FT-IR** ( $\nu/\text{cm}^{-1}$ , neat) : 3048, 1896, 1587, 708, 688, 506.

## 4. Near-Infrared Photoredox catalysis

### 4.1 Set-up

The reactions were run in a 5 mL glass tube or in a 5 mL round bottom single neck flask equipped with magnetic stir bar (closed with a septum for reduction). One NIR LED (810 nm) is placed at 2-3 cm away from the light source. The system is fully covered by aluminum foil to remove the external visible light. Reaction was performed at room temperature.

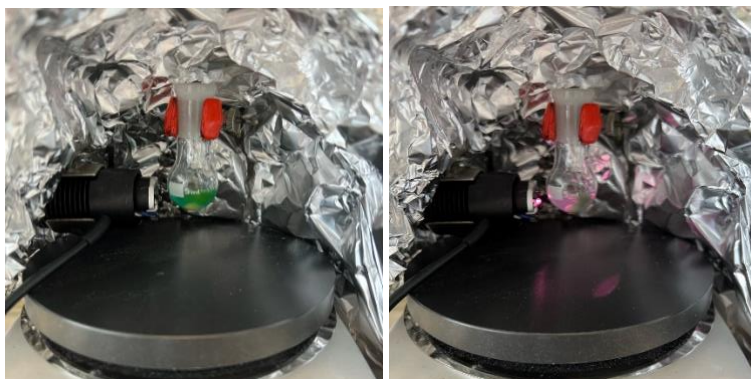

### 4.2 Optimization Table of Aza-Henry reaction

Reactions were run in 0.13 mmol scale,  $C = 0.1$  M and  $x$  mol% of Photocatalyst (PC).  $^1\text{H-NMR}$  conversions determined on the crude reaction mixture.

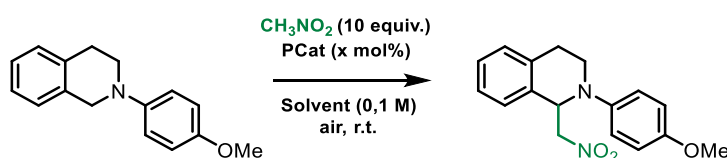

<sup>8</sup> D. El-Marrouki, S. Touchet, A. Abdelli, H. M'Rabet, M. Lotfi Efrit, P. C. Gros *Beilstein J. Org. Chem.* **2020**, *16*, 1722-1731

| Param.          | Entry     | PC           | x(mol%)  | Time (h) | solvent                         | $\lambda$ (nm) | Conv.% (yield %) |
|-----------------|-----------|--------------|----------|----------|---------------------------------|----------------|------------------|
| <b>PCat</b>     | 1         | Sq652        | 5        | 24       | DMSO                            | 810            | 100              |
|                 | 2         | Sq660        | 5        | 24       | DMSO                            | 810            | 11               |
|                 | 3         | Sq670        | 5        | 24       | DMSO                            | 810            | 10               |
|                 | 4         | Sq687        | 5        | 24       | DMSO                            | 810            | 100 (48)         |
| <b>Solvent</b>  | 5         | Sq687        | 5        | 24       | CH <sub>3</sub> CN              | 810            | 38               |
|                 | 6         | Sq687        | 5        | 24       | iPrOH                           | 810            | 35               |
|                 | 7         | Sq687        | 5        | 24       | HFIP                            | 810            | 29               |
|                 | 8         | Sq687        | 5        | 24       | CH <sub>3</sub> NO <sub>2</sub> | 810            | 8                |
|                 | 9         | Sq687        | 5        | 24       | DMF                             | 810            | 5                |
|                 | 10        | Sq687        | 5        | 24       | DCM                             | 810            | 5                |
| <b>Time</b>     | <b>11</b> | <b>Sq687</b> | <b>5</b> | <b>6</b> | <b>DMSO</b>                     | <b>810</b>     | <b>70 (70)</b>   |
| <b>LED</b>      | 12        | Sq687        | 5        | 6        | DMSO                            | 660            | 100 (56)         |
| <b>Control.</b> | 13        | /            | /        | 6        | DMSO                            | 810            | 7                |
| <b>Exp.</b>     | 14        | Sq687        | 5        | 6        | DMSO                            | /              | 0                |

#### Aza-Henry kinetic profil : conversion comparison of different squaraines

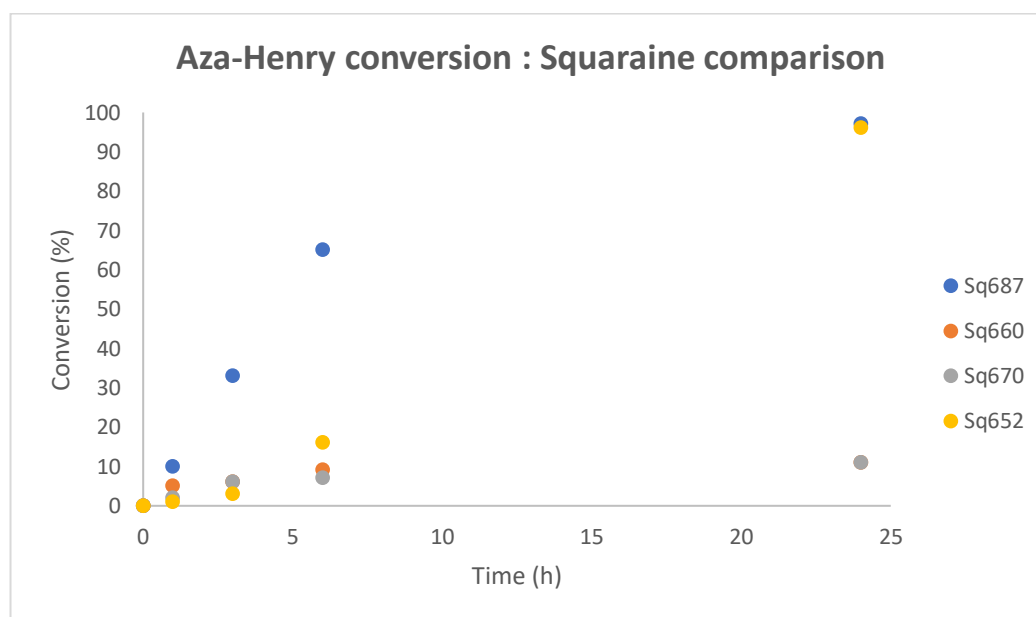

(Reaction conditions : 10 equiv. CH<sub>3</sub>NO<sub>2</sub>, 5 mol% PCat, DMSO, LED-810 nm, kinetic conversion was determined by <sup>1</sup>H NMR after 1, 3, 6 and then 24 h of reaction)

## Aza-Henry profil : conversion comparison with different source of illumination (with Sq687)

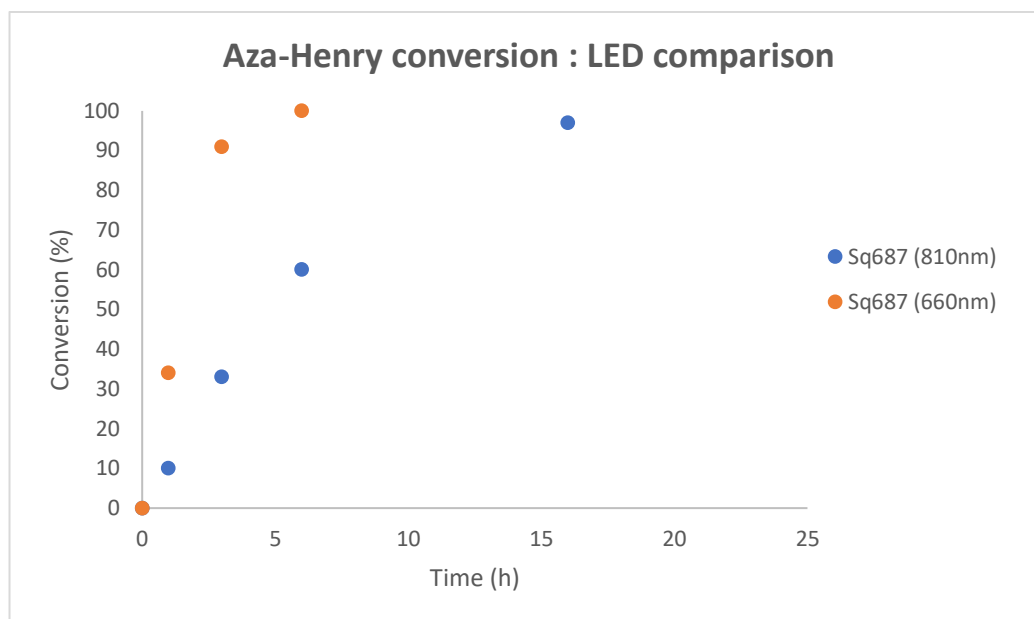

(Reaction conditions : 10 equiv.  $\text{CH}_3\text{NO}_2$ , 5 mol% Sq687, DMSO)

### Screening conditions for the substrat scope (LED 810 nm)

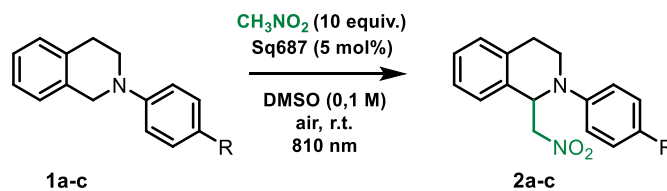

| Entry | R   | Time (h) | Yield (%) |
|-------|-----|----------|-----------|
| 1     | H   | 6        | 68        |
| 2     | H   | 8        | 81        |
| 3     | H   | 16       | 62        |
| 4     | OMe | 6        | 70        |
| 5     | OMe | 8        | 61        |
| 6     | OMe | 16       | 48        |
| 7     | F   | 8        | 45        |
| 8     | F   | 16       | 71        |

## Screening conditions for the substrat scope (LED 660 nm)

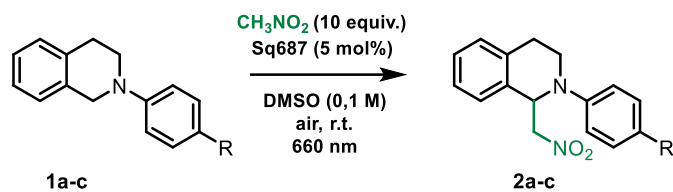

| Entry | R   | Time (h) | Yield (%) |
|-------|-----|----------|-----------|
| 1     | H   | 6        | 57        |
| 2     | OMe | 3        | 48        |
| 3     | OMe | 6        | 56        |
| 5     | F   | 6        | 25        |
| 6     | F   | 48       | 61        |

## Degradation of Aza-Henry product (<sup>1</sup>H NMR spectra)

Aza-Henry product was placed in photoredox catalysis conditions (Sq687 5 mol% in DMSO-d6) for 24 or 48 h :

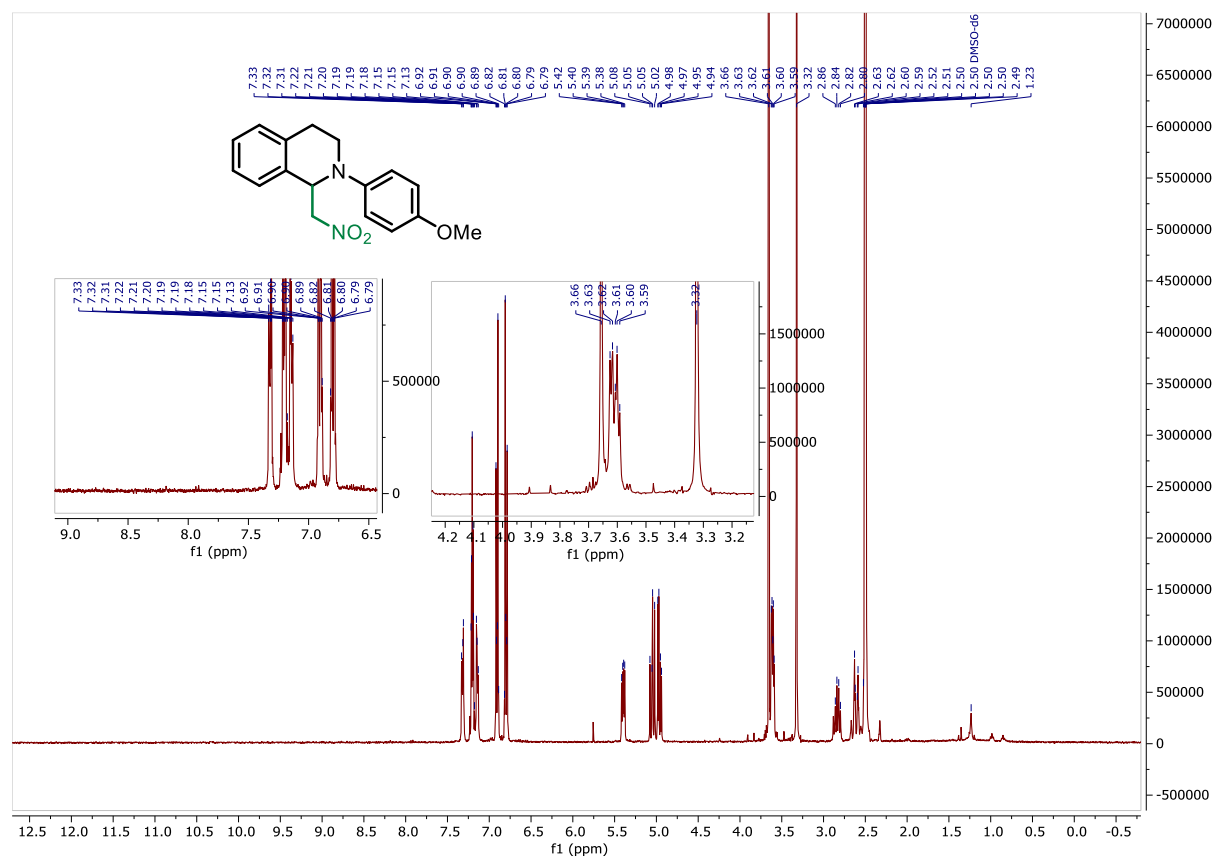

<sup>1</sup>H NMR spectra in DMSO-d<sub>6</sub> before irradiation

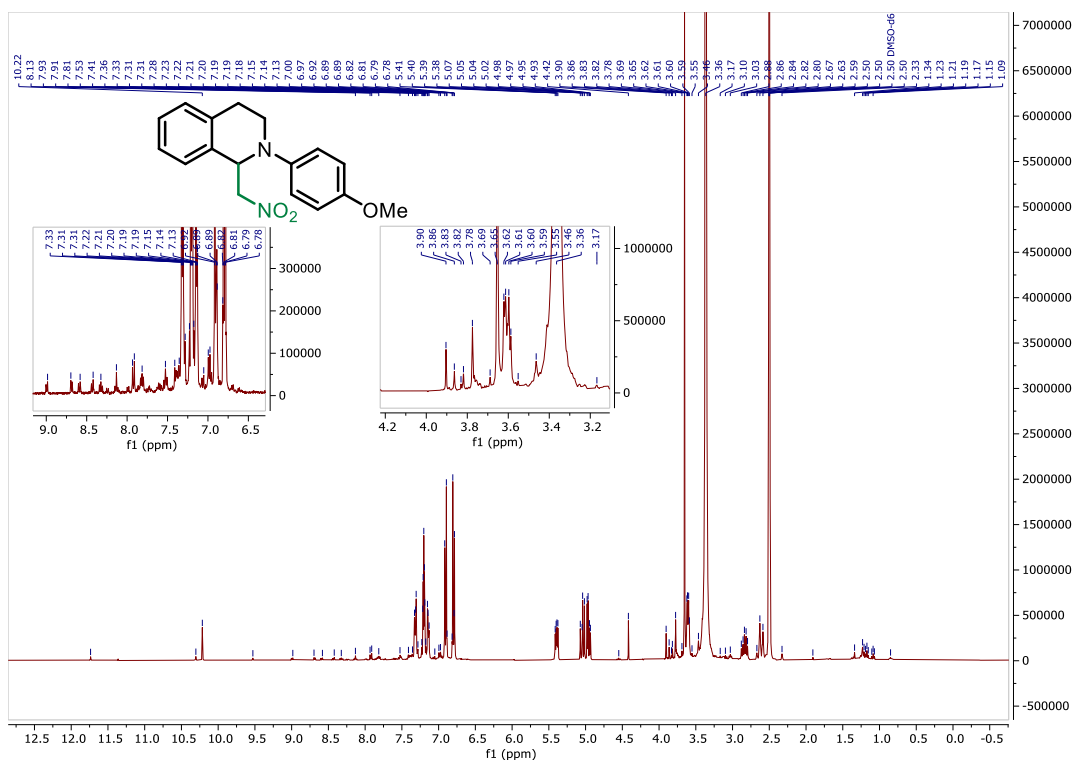

<sup>1</sup>H NMR spectra in DMSO-d<sub>6</sub> after 24 h of irradiation

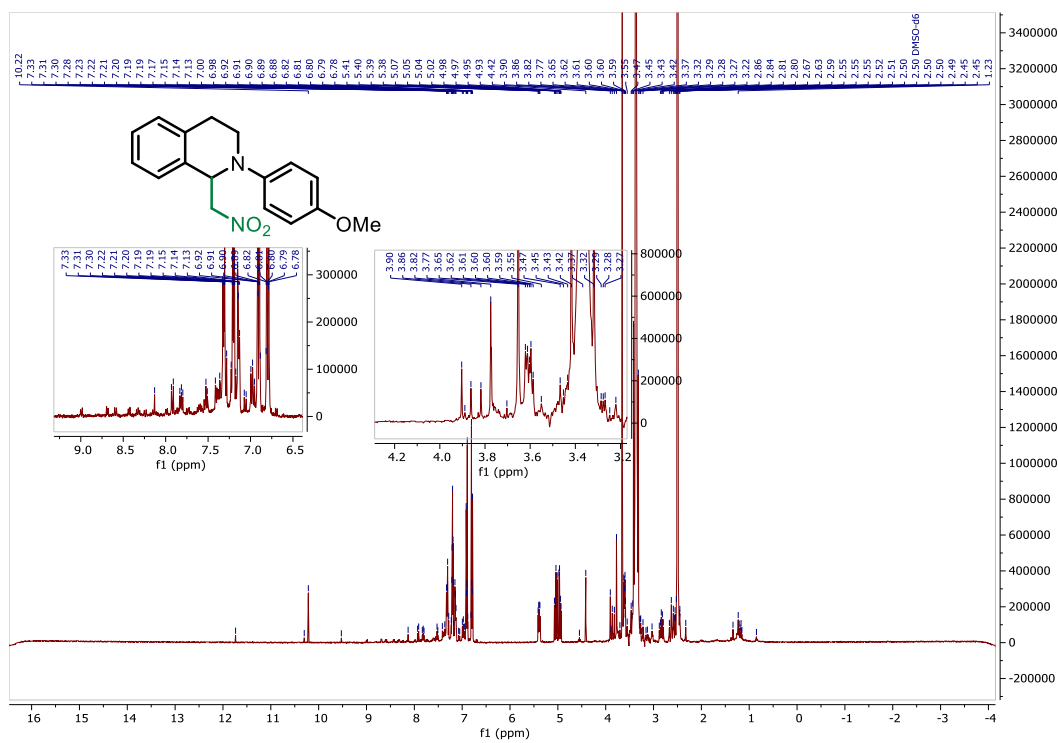

<sup>1</sup>H NMR spectra in DMSO-d<sub>6</sub> after 48 h of irradiation



### 4.3 Aza-Henry: scope of substrat

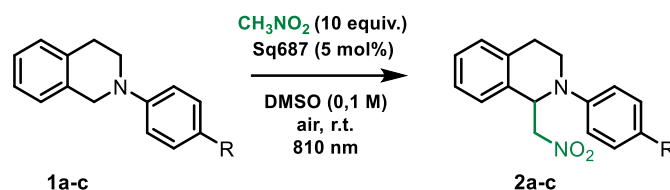

| Entry | R   | Time (h) | yield |
|-------|-----|----------|-------|
| 1     | H   | 8        | 81 %  |
| 2     | OMe | 6        | 70 %  |
| 3     | F   | 16       | 71 %  |

**General Procedure:** 2-Aryl-1,2,3,4-tetrahydroisoquinoline (0.13 mmol, 1 equiv.), nitromethane (1.3 mmol, 10 equiv.), Sq687 (3.8 mg, 0.0066 mmol, 5 mol%) and DMSO (1.3 mL) were charged in a reaction glass tube with magnetic stirring bar. The reaction mixture was stirred under air atmosphere and near infrared LED (810 nm) irradiation (2-3 cm away from the light source) at room temperature for 6 to 16h. The crude mixture was extracted with ethyl acetate (3 x 10 mL). The combined organic layers were dried over MgSO<sub>4</sub>, filtered and concentrated under vacuum pressure. The crude was purified by column chromatography on silica gel (pentane: Et<sub>2</sub>O = 9: 1) to give **2a-c**.

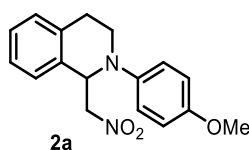

**2-(4-methoxyphenyl)-1-(nitromethyl)-1,2,3,4-tetrahydroisoquinoline 2a:** According to the general procedure, **2a** is obtained after 6 h of reaction as yellow oil (m= 26 mg, yield= 70 %). Data are conformed to the literature<sup>5</sup>.  $R_f$ = 0.28 (pentane: Et<sub>2</sub>O = 9: 1). <sup>1</sup>H NMR (400 MHz, CDCl<sub>3</sub>) δ 7.29– 7.16 (m, 4H), 6.95 (dt,  $J$  = 9.1, 3.5 Hz, 2H), 6.85 (dt,  $J$  = 9.1, 3.5 Hz, 2H), 5.43 (dd,  $J$  = 8.4, 5.9 Hz, 1H), 4.83 (dd,  $J$  = 11.9, 8.7 Hz, 1H), 4.58 (dd,  $J$  = 11.9, 5.9 Hz, 1H), 3.77 (s, 3H), 3.64 - 3.54 (m, 2H), 3.04 (m, 1H), 2.72 (dt,  $J$  = 16.6, 3.9 Hz, 1H). <sup>13</sup>C NMR (100 MHz, CDCl<sub>3</sub>) δ 154.0, 143.1, 135.5, 132.9, 129.5, 127.9, 127.0, 126.6, 118.8 (2C), 114.7 (2C), 78.9, 58.9, 55.6, 43.1, 25.8. FT-IR (ν/cm<sup>-1</sup>, neat) : 3675, 2970, 2901, 1550, 1509, 1379, 1244, 1037.

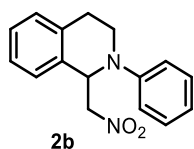

**1-(nitromethyl)-2-phenyl-1,2,3,4-tetrahydroisoquinoline 2b :** According to the general procedure, **2b** is obtained after 8 h of reaction as yellow oil (m= 31 mg, yield= 81%). Data are conformed to the literature.<sup>5</sup>  $R_f$ = 0.46 (pentane : Et<sub>2</sub>O = 9 : 1). <sup>1</sup>H NMR (400 MHz, CDCl<sub>3</sub>) 7.33 – 7.16 (m, 6H), 7.00 (m, 2H), 6.89 (t,  $J$  = 7.2 Hz, 1H), 5.59 (t,  $J$  = 7.2 Hz, 1H), 4.90 (dd,  $J$  = 11.8, 7.8 Hz, 1H), 4.60 (dd,  $J$  = 11.8, 6.6 Hz, 1H), 3.73 – 3.62 (m, 2H), 3.15 – 3.09 (m, 1H), 2.85-2.80 (dt,  $J$  = 16.3, 4.9 Hz, 1H). <sup>13</sup>C NMR

(100 MHz, CDCl<sub>3</sub>)  $\delta$  148.5, 135.4, 133.0, 129.6 (2C), 129.3, 128.2, 127.1, 126.8, 119.5, 115.2 (2C), 78.9, 58.3, 42.1, 26.5. **FT-IR** ( $\nu$ /cm<sup>-1</sup>, neat) : 3670, 2986, 2923, 1552, 1264, 1086, 737.

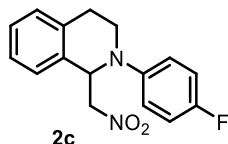

**2-(4-fluorophenyl)-1-(nitromethyl)-1,2,3,4-tetrahydroisoquinoline 2c** : According to the general procedure, **2c** is obtained after 16 h of reaction as yellow oil (m = 27 mg, yield = 71%). Data are conformed to the literature<sup>5</sup>.  $R_f$  = 0.38 (pentane : Et<sub>2</sub>O = 9 : 1). **<sup>1</sup>H NMR** (400 MHz, CDCl<sub>3</sub>)  $\delta$  7.28–7.14 (m, 4H), 6.97–6.89 (m, 4H), 5.43 (dd,  $J$  = 8.6, 6.0 Hz, 1H), 4.84 (dd,  $J$  = 12.0, 8.6 Hz, 1H), 4.58 (dd,  $J$  = 12.0, 5.9 Hz, 1H), 3.60 (m, 2H), 3.07–2.99 (m, 1H), 2.73 (dt,  $J$  = 16.5, 4.2 Hz, 1H). **<sup>13</sup>C NMR** (100 MHz, CDCl<sub>3</sub>)  $\delta$  158.2 (d,  $J$  = 239.2 Hz), 145.4 (d,  $J$  = 2.0 Hz), 135.3, 132.6, 129.5, 128.2, 127.0, 126.8, 118.0 (d,  $J$  = 7.6 Hz, 2C), 115.9 (d,  $J$  = 22.3 Hz, 2C), 78.9, 58.8, 42.9, 25.8. **<sup>19</sup>F NMR** (376 MHz, CDCl<sub>3</sub>)  $\delta$  -124.3. **FT-IR** ( $\nu$ /cm<sup>-1</sup>, neat) : 3005, 2928, 1555, 1508, 1264, 737.

#### 4.4 Aza-Henry: scope of nucleophiles

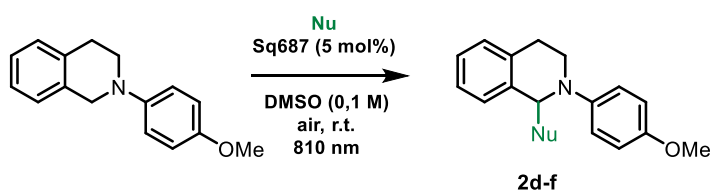

#### Synthesis of 2-(4-methoxyphenyl)-1,2,3,4-tetrahydroisoquinoline-1-carbonitrile 2d

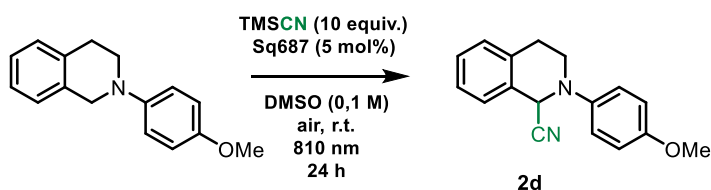

2-(4-methoxyphenyl)-1,2,3,4-tetrahydroisoquinoline **1a** (30 mg, 0.13 mmol, 1 equiv.), trimethylsilyl cyanide (TMSCN) (124 mg, 1.3 mmol, 10 equiv.), Sq687 (3.6 mg, 0.0063 mmol, 5 mol%) and DMSO (1.3 mL) were charged in a reaction glass tube with magnetic stirring bar. The reaction mixture was stirred under air atmosphere and near infrared LED (810 nm) irradiation (2-3 cm away from the light source) at room temperature for 24 h. The crude mixture was extracted with ethyl acetate (3 x 10 mL). The combined organic layers were dried over MgSO<sub>4</sub>, filtered and concentrated under vacuum pressure. The crude was purified by column chromatography on aluminum oxide (ether petroleum: EtOAc = 8:2) to give **2d** (m = 24 mg, yield = 72%) as a yellow oil. Data are conformed to the

literature<sup>9</sup>.  $R_f$  = 0.46 (ether petroleum: EtOAc = 8:2)  $^1\text{H NMR}$  (400 MHz,  $\text{CDCl}_3$ )  $\delta$  7.33-7.29 (m, 1H), 7.28-7.26 (m, 2H), 7.24-7.23 (m, 1H), 7.09 (dt,  $J$  = 9.1, 3.6 Hz, 2H), 6.92 (d,  $J$  = 9.1, 3.6 Hz, 2H), 5.37 (s, 1H), 3.81 (s, 3H), 3.61-3.57 (m, 1H), 3.44 (td,  $J$  = 12.0, 4.0 Hz, 1H), 3.21-3.14 (m, 1H), 2.96-2.92 (m, 1H).  $^{13}\text{C NMR}$  (126 MHz,  $\text{CDCl}_3$ )  $\delta$  155.8, 142.7, 134.5, 129.8, 129.6, 128.8, 127.2, 126.8, 121.2 (2C), 117.7, 114.9 (2C), 55.8, 55.7, 45.0, 28.8. **FT-IR** ( $\text{v}/\text{cm}^{-1}$ , neat) : 2937, 2838, 1612, 1511, 1462, 1245, 1030, 830, 733.

### Synthesis of diethyl (2-(4-methoxyphenyl)-1,2,3,4-tetrahydroisoquinolin-1-yl)phosphonate 2e

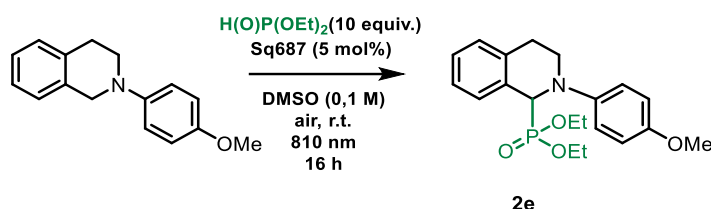

2-(4-methoxyphenyl)-1,2,3,4-tetrahydroisoquinoline **1a** (30 mg, 0.13 mmol, 1 equiv.), diethyl phosphite (173 mg, 1.3 mmol, 10 equiv.), Sq687 (3.6 mg, 0.0065 mmol, 5 mol%) and DMSO (1.3 mL) were charged in a reaction glass tube with magnetic stirring bar. The reaction mixture was stirred under air atmosphere and near infrared LED (810 nm) irradiation (2-3 cm away from the light source) at room temperature for 24 h. The crude mixture was extracted with ethyl acetate (3 x 10 mL). The combined organic layers were dried over  $\text{MgSO}_4$ , filtered and concentrated under vacuum pressure. The crude was purified by column chromatography on silica gel (DCM to ether petroleum: EtOAc = 8:2) to give **2e** (m = 37 mg, yield = 79%). Data are conformed to the literature<sup>10</sup>.  $R_f$  = 0.36 (ether petroleum: EtOAc = 8:2).  $^1\text{H NMR}$  (500 MHz,  $\text{CDCl}_3$ )  $\delta$  7.39-7.38 (m, 1H), 7.19-7.12 (m, 3H), 6.92 (dt,  $J$  = 9.1, 3.7 Hz, 2H), 6.81 (d,  $J$  = 9.1, 3.7 Hz, 2H), 5.02 (d,  $J$  = 21.5 Hz, 1H), 4.13-3.92 (m, 5H), 3.75 (s, 3H), 3.56-3.53 (dt,  $J$  = 12.7, 5 Hz, 1H), 2.94-2.91 (m, 2H), 1.25 (t,  $J$  = 7.1 Hz, 3H), 1.16 (t,  $J$  = 7.1 Hz, 3H).  $^{13}\text{C NMR}$  (126 MHz,  $\text{CDCl}_3$ )  $\delta$  153.2, 144.3 (d,  $J$  = 8.3 Hz), 136.5 (d,  $J$  = 6.1 Hz), 130.6, 129.0 (d,  $J$  = 2.8 Hz), 128.3 (d,  $J$  = 3.7 Hz), 127.4 (d,  $J$  = 3.7 Hz), 125.9 (d,  $J$  = 3.7 Hz), 117.7 (2C), 114.6 (2C), 63.5 (d,  $J$  = 7.5 Hz), 62.3 (d,  $J$  = 7.4 Hz), 60.2, 58.9, 55.8, 44.8, 26.2, 16.6 (dd,  $J$  = 13.0, 5.6 Hz).  $^{31}\text{P NMR}$  (203 MHz,  $\text{CDCl}_3$ )  $\delta$  22.2. **FT-IR** ( $\text{v}/\text{cm}^{-1}$ , neat) : 3412, 2979, 2905, 2833, 1660, 1628, 1508, 1241, 1019, 960, 742, 562.

### Synthesis of 2-(4-methoxyphenyl)-1-(phenylethynyl)-1,2,3,4-tetrahydroisoquinoline 2f

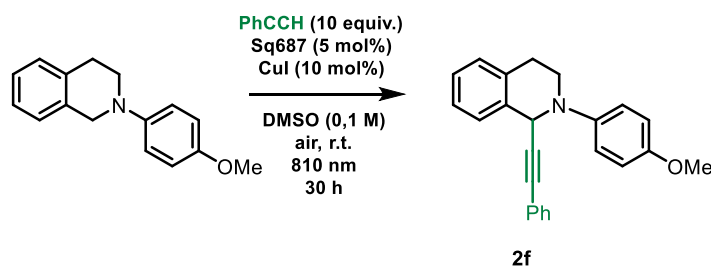

2-(4-methoxyphenyl)-1,2,3,4-tetrahydroisoquinoline **1a** (30 mg, 0.13 mmol, 1 equiv.), phenylethyne (128 mg, 1.3 mmol, 10 equiv.), Sq687 (3.6 mg, 0.0063 mmol, 5 mol%), CuI (2.4 mg, 0.013 mmol, 10 mol%) and DMSO (1.3 mL) were charged in a reaction glass tube with magnetic stirring bar. The

<sup>9</sup> M. Rueping, S. Zhu, R. M. Koenigs *Chem. Commun.* **2011**, 47, 12709-12711

<sup>10</sup> H. Durga, B. Koenig *Org. Lett.* **2011**, 13, 3852-3855

reaction mixture was stirred under air atmosphere and near infrared LED (810nm) irradiation (2-3 cm away from the light source) at room temperature for 30 h. The crude mixture was extracted with ethyl acetate (3 x 10 mL). The combined organic layers were dried over MgSO<sub>4</sub>, filtered, and concentrated under vacuum pressure. The crude was purified by column chromatography on silica gel (Ether petroleum to ether petroleum: EtOAc = 9:1) to give **2f** (m = 32 mg, yield = 75%) as a yellow oil. Data are conformed to the literature<sup>11</sup>. *R<sub>f</sub>* = 0.53 (ether petroleum: EtOAc = 9:1). <sup>1</sup>H NMR (500 MHz, CDCl<sub>3</sub>) δ 7.41-7.37 (m, 1H), 7.33-7.30 (m, 2H), 7.28-7.20 (m, 6H), 7.12 (dt, *J* = 10.5, 3.7 Hz, 2H), 6.89 (dt, *J* = 10.5, 3.7 Hz, 2H), 5.55 (s, 1H), 3.82 (s, 3H), 3.70-3.50 (m, 1H), 3.61-3.57 (m, 1H), 3.22-3.15 (m, 1H) 2.97 (dt, *J* = 16.3, 3.7 Hz, 1H). <sup>13</sup>C NMR (126 MHz, CDCl<sub>3</sub>) δ 154.4, 144.3, 135.6, 134.2, 131.8 (2C), 129.2, 128.2 (2C), 128.1, 127.6, 127.3, 126.3k, 123.2, 120.3 (2C), 114.5 (2C), 88.6, 85.6, 55.7, 54.5, 44.4, 29.2. FT-IR (ν/cm<sup>-1</sup>, neat): 3283, 2907, 2831, 1657, 1597, 1508, 1241, 1035, 823, 753.

#### 4.5 Other Near-Infrared Photoredox Catalysis

##### Synthesis of 5-Methyl-2-phenyl-3a,4,5,9b-tetrahydro-1H-pyrrolo[3,4-c]quinoline1,3(2H)-dione **7**

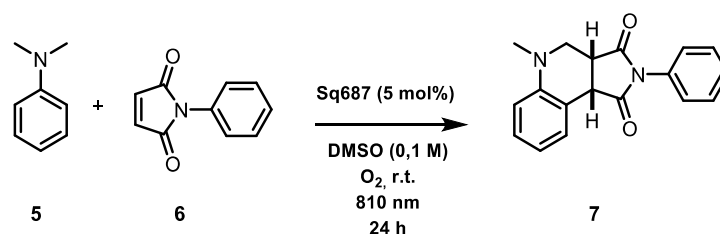

The *N,N*-dimethylaniline **5** (147 mg, 1.21 mmol, 7 equiv), *N*-phenyl maleimide **6** (30 mg, 0.17 mmol, 1 equiv), Sq687 (5 mg, 0.0087 mmol, 5 mol%) and DMSO (1.7 mL) were placed in a standard glass reaction tube with magnetic stir bar. The reaction mixture was stirred under oxygen atmosphere (1 atm, balloon) and near infrared LED (810 nm), irradiation (2-3 cm away from the light source) at room temperature for 24 h. The crude mixture was extracted with ethyl acetate (3 x 10 mL). The combined organic layers were dried over Na<sub>2</sub>SO<sub>4</sub>, filtered and concentrated under vacuum pressure. The crude was purified by column chromatography on silica gel (DCM: cyclohexane = 1:1 to DCM) to give **7** (m = 32 mg, yield = 63 %) as a yellow oil and single diastereoisomer. Data are conformed to the literature<sup>12</sup>. *R<sub>f</sub>* = 0.46 (DCM). <sup>1</sup>H NMR (500 MHz, CDCl<sub>3</sub>) δ 7.54 (m, 1H), 7.45--7.41 (m, 2H), 7.38-7.34 (m, 1H), 7.28-7.22 (m, 3H), 6.91 (td, *J* = 7.5, 1.1 Hz, 1H), 6.76 (m, 1H), 4.16 (d, *J* = 9.6 Hz, 1H), 3.62 (dd, *J* = 11.5, 2.7 Hz, 1H), 3.56-3.52 (ddd, *J* = 9.5, 4.4, 2.7 Hz, 1H), 3.13 (dd, *J* = 11.5, 4.4 Hz, 1H), 2.84 (s, 3H). <sup>13</sup>C NMR (126 MHz, CDCl<sub>3</sub>) δ 177.8, 175.9, 148.6, 132.1, 130.5, 129.1 (2C), 128.8, 128.6, 126.5 (2C), 119.8, 118.7, 112.7, 50.8, 43.7, 42.3, 39.6. FT-IR (ν/cm<sup>-1</sup>, neat) : 2967, 2861, 2811, 2785, 1706, 1597, 1496, 1391, 1196, 751, 692.

<sup>11</sup> W. Fu, W. Guo, G. Zou, C. Xu *Journal of Fluorine Chemistry* **2012**, *140*, 88-94

<sup>12</sup> Z. Liang, S. Xu, W. Tian, R. Zhang *Beilstein J. Org. Chem.* **2015**, *11*, 425-430

### Synthesis of (*E*)-1,4-diphenylbut-2-ene-1,4-dione **9**

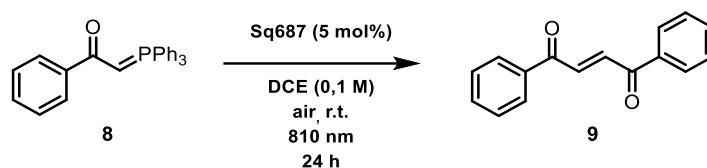

(Benzoylmethylene)triphenylphosphorane **8** (30 mg, 0.08 mmol, 1 equiv.), Sq687 (2.3 mg, 0.004 mmol, 5 mol %) were charged in a 5 mL round bottom flask equipped with a magnetic stirring bar. Then DCE (1.6 mL) was added at the round bottom flask and the reaction mixture was stirred and irradiated with a near infrared light source (810 nm, 2-3 cm away from the LED lamp) at room temperature under air conditions for 24 h. Finally, the solvent was removed in vacuum and the crude residue was purified by column chromatography on silica gel (ether petroleum: EtOAc = 9:1) to afford **9** (m= 6 mg, yield = 65%) as a slightly yellow solid. Data are conformed to the literature<sup>13</sup>.  $R_f$  = 0.44 (ether petroleum: EtOAc = 9:1). <sup>1</sup>H NMR (400 MHz, CDCl<sub>3</sub>) δ 8.08-8.06 (m, 4H), 8.02 (s, 2H), 7.64 (tt, *J* = 14.8, 6.9, 1.3 Hz, 2H), 7.56-7.52 (m, 4H). <sup>13</sup>C NMR (126 MHz, CDCl<sub>3</sub>) δ 190.0 (2C), 137.0 (2C), 135.3 (2C), 134.0 (2C), 129.1 (2C), 129.0 (2C). FT-IR (ν/cm<sup>-1</sup>, neat) : 3063, 2962, 2928, 1708, 1644, 1593, 1290, 1017, 701, 632.

### Synthesis of 4,4'-(3,3,3-trifluoroprop-1-ene-1,1-diyl)bis(methoxybenzene) **11**

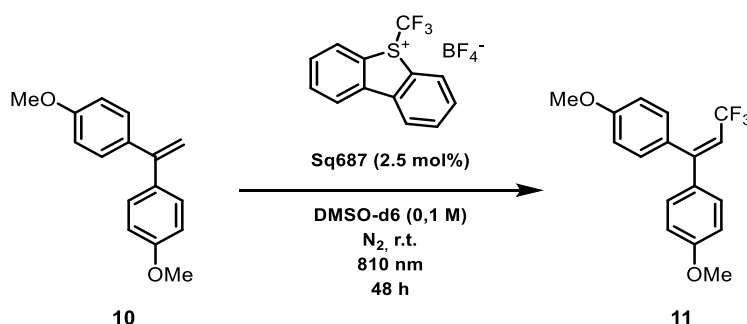

1,1-bis(4-methoxyphenyl)ethene **10** (25 mg, 0.1 mmol, 1 equiv.), Umemoto's reagent [CAS:131880-16-5] (34 mg, 0.1 mmol, 1 equiv.), Sq687 (1.5 mg, 0.003 mmol, 2.5 mol %) were charged in a reaction glass tube with a magnetic stirring bar. The glass tube was placed under N<sub>2</sub>. Then DMSO-*d*<sub>6</sub> (1 mL) was degassed by three cycles of freeze-pump-thaw before being added at the glass tube. The mixture was stirred and irradiated with a near infrared light source (810 nm, 2-3 cm away from the LED lamp) at room temperature. After 48 h of reaction, durene (14 mg, 0.1 mmol, 1 equiv.) was added as an internal standard to the glass tube NMR yield = 75 %. Data are conformed to literature<sup>14</sup>.

(The pure product was not isolated, a mixture between the 4,4'-(3,3,3-trifluoroprop-1-ene-1,1-diyl)bis(methoxybenzene) and the 4,4'-(3,3,3-trifluoro-2-(trifluoromethyl)prop-1-ene-1,1-diyl)bis(methoxybenzene) was always obtained)

<sup>13</sup> M. Wang, Y.-Q. He, Y. Zhu, Z.-B. Song, X.-Y. Wang, H.-Y. Huang, B.-P. Cao, W.-F. Tian, Q. Xiao *Org. Chem. Front.* **2021**, *8*, 5934-5940

<sup>14</sup> R. Tomita, Y. Yasu, T. Koike, M. Akita *Beilstein J. Org. Chem.* **2014**, *10*, 1099-1106

## 4.6 Mechanistic study

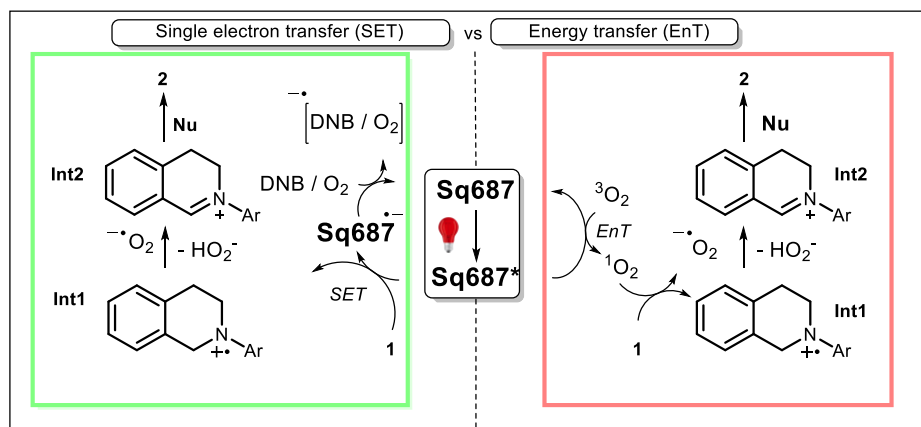

With the controlled experiments (see below) we can supposed that single electron transfer is the privileged mechanism for the aza-Henry transformation with the use of Sq687 as photocatalyst.

### Single electron transfer vs Energy transfer investigation

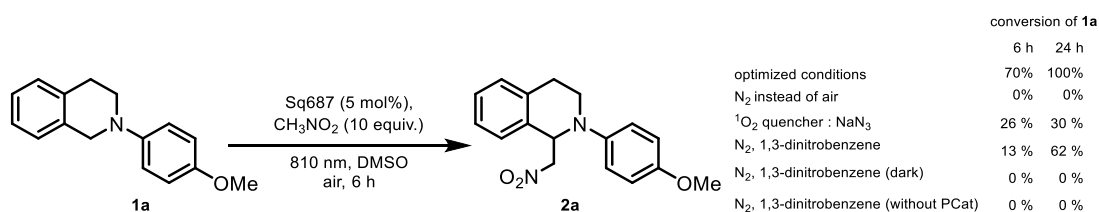

### General procedure under N<sub>2</sub>

2-(4-methoxyphenyl)-1,2,3,4-tetrahydroisoquinoline (0.13 mmol, 1 equiv.), Sq687 (3.8 mg, 0.0066 mmol, 5 mol%) and 1,3-dinitrobenzene (0.13 mmol, 1 equiv.) were charged in a reaction glass tube with magnetic stirring bar. The reaction media was purged 3 times with N<sub>2</sub>. Then DMSO-d<sub>6</sub> was degassed by 3 freeze-pump-thaw cycles and refill with N<sub>2</sub> before being added to the reaction media. Finally, nitromethane (1.3 mmol, 10 equiv.) was added to the mixture. Then the mixture was stirred under N<sub>2</sub> atmosphere and near infrared LED (810 nm) irradiation (2-3 cm away from the light source) at room temperature for 24 h. Conversions were measured after 6 and 24 h of irradiation.

## General procedure under air

2-(4-methoxyphenyl)-1,2,3,4-tetrahydroisoquinoline (0.13 mmol, 1 equiv.), nitromethane (1.3 mmol, 10 equiv.), Sq687 (3.8 mg, 0.0066 mmol, 5 mol%), NaN<sub>3</sub> (0.39 mmol, 3 equiv.) and DMSO-d<sub>6</sub> (1.3 mL) were charged in a reaction glass tube with magnetic stirring bar. The reaction mixture was stirred under air atmosphere and near infrared LED (810 nm) irradiation (2-3 cm away from the light source) at room temperature for 24 h (vial capped). Conversions were measured after 6 and 24 h of irradiation.

## Degradation of Sq687 with NaN<sub>3</sub>:

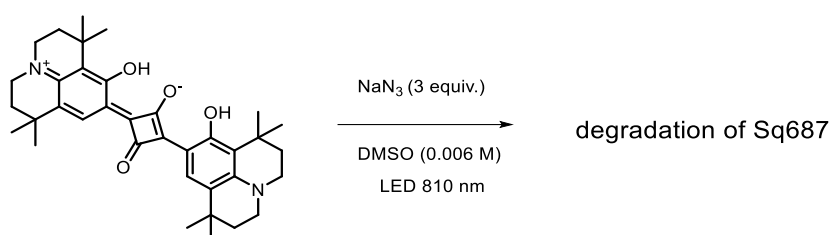

Sq687 (0.007 mmol, 1 equiv.) and NaN<sub>3</sub> (0.387 mmol, 3 equiv.) and DMSO (1.3 mL) was placed in a microwave tube and placed under near infrared LED (810 nm) irradiation (2-3 cm away from the light source) at room temperature for 24 h. The crude mixture was extracted with ethyl acetate (3 x 10 mL). The combined organic layers were dried over MgSO<sub>4</sub>, filtered and concentrated under vacuum pressure. The crude was analyzed by NMR to give the corresponding <sup>1</sup>H NMR spectra below.

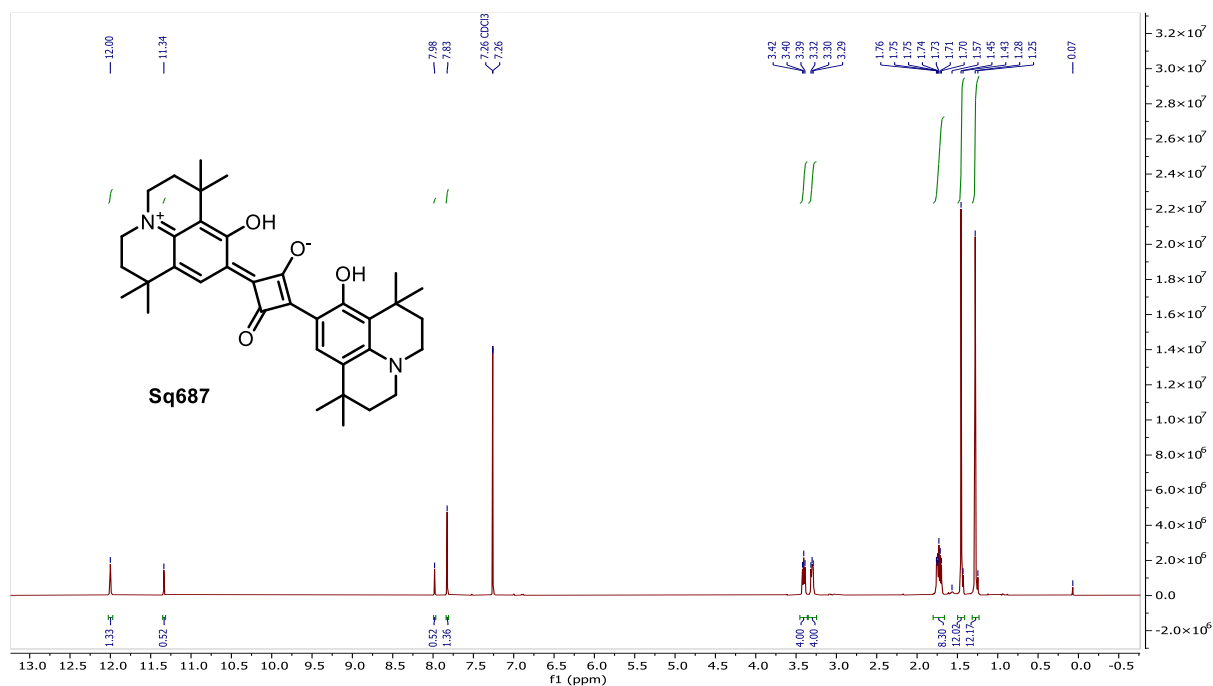

<sup>1</sup>H NMR spectra of Sq687 in CDCl<sub>3</sub> before irradiation

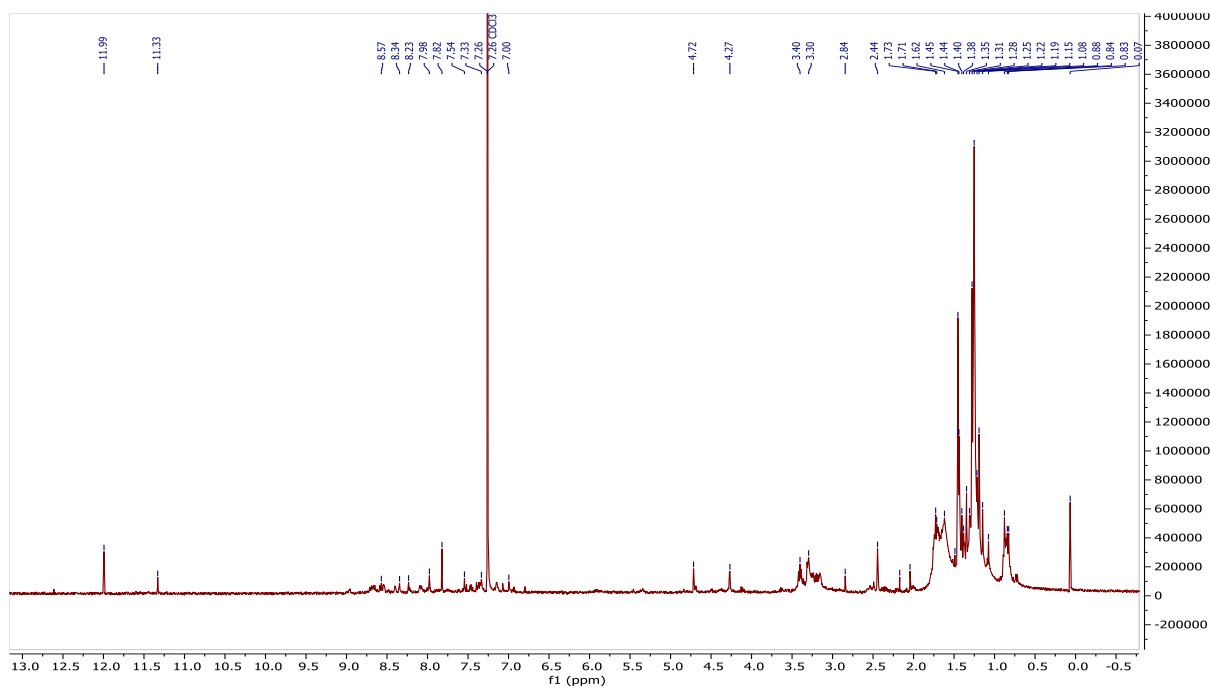

$^1\text{H}$  NMR spectra of the crude product in  $\text{CDCl}_3$  after 24h of irradiation

### EDA complex investigation:

To control if any electron donor-acceptor complex took place in the mechanism of the photocatalysis in the case who 1,3-dinitrobenzene was used as co-oxidant, we measured the absorbance of the mixture Sq687/1,3-dinitrobenzene. (With the same proportion as in the reaction media) For the spectrum of Sq687 and 1,3-dinitrobenzene, concentrations were plot at  $20\ \mu\text{mol}$  and  $20\ \text{mM}$  respectively in DMSO.

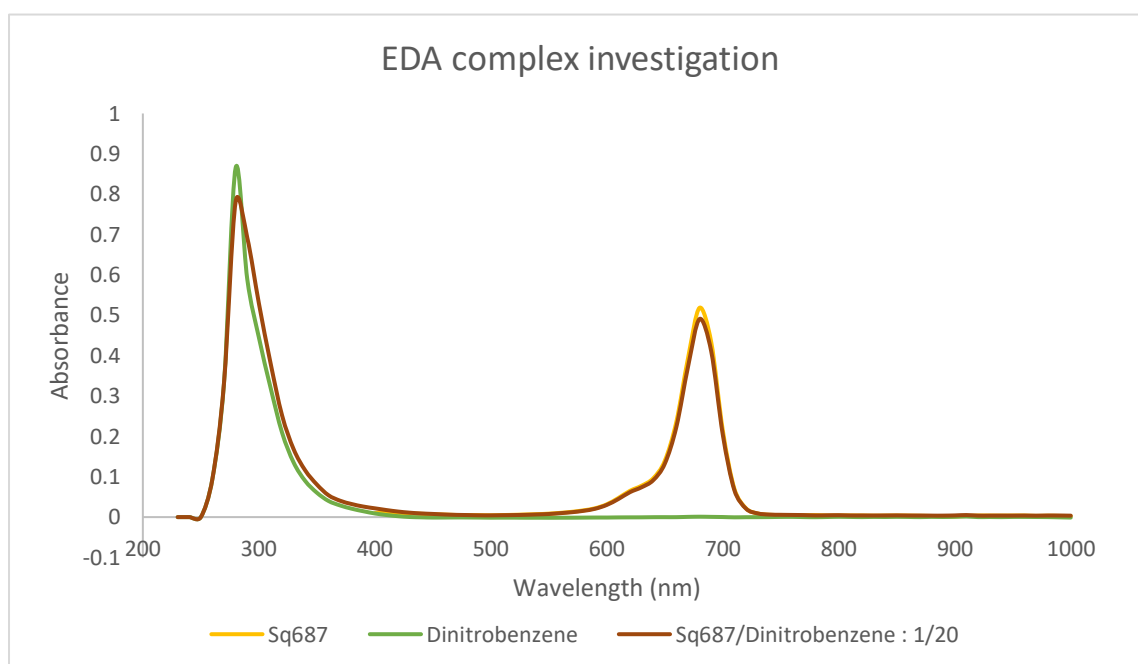

### $^1\text{O}_2$ generation: control experiment



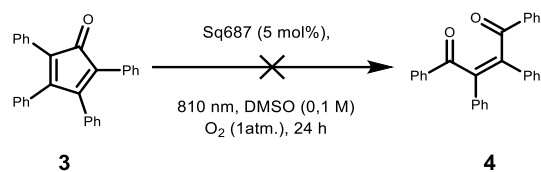

1,2,3,4-tetraphenylcyclopentadienone **3** (70 mg, 0.13 mmol, 1 equiv.), Sq687 (5.3 mg, 0.009 mmol, 5 mol%) and DMSO-d6 (2 mL) were charged in a reaction glass tube with magnetic stirring bar. Then O<sub>2</sub> was bubbled for 15 min, after, the reaction mixture was stirred under O<sub>2</sub> atmosphere (1 atm., balloon) and near infrared LED (810 nm) irradiation (2-3 cm away from the light source) at room temperature for 24 h. No conversion of start was observed after 24 h, only few traces of the corresponding product **4**.

**5. <sup>1</sup>H, <sup>13</sup>C, <sup>19</sup>F and <sup>31</sup>P NMR spectra of products:**

### 2-phenyl-1,2,3,4-Tetrahydroisoquinoline (1a)

<sup>1</sup>H CDCl<sub>3</sub>

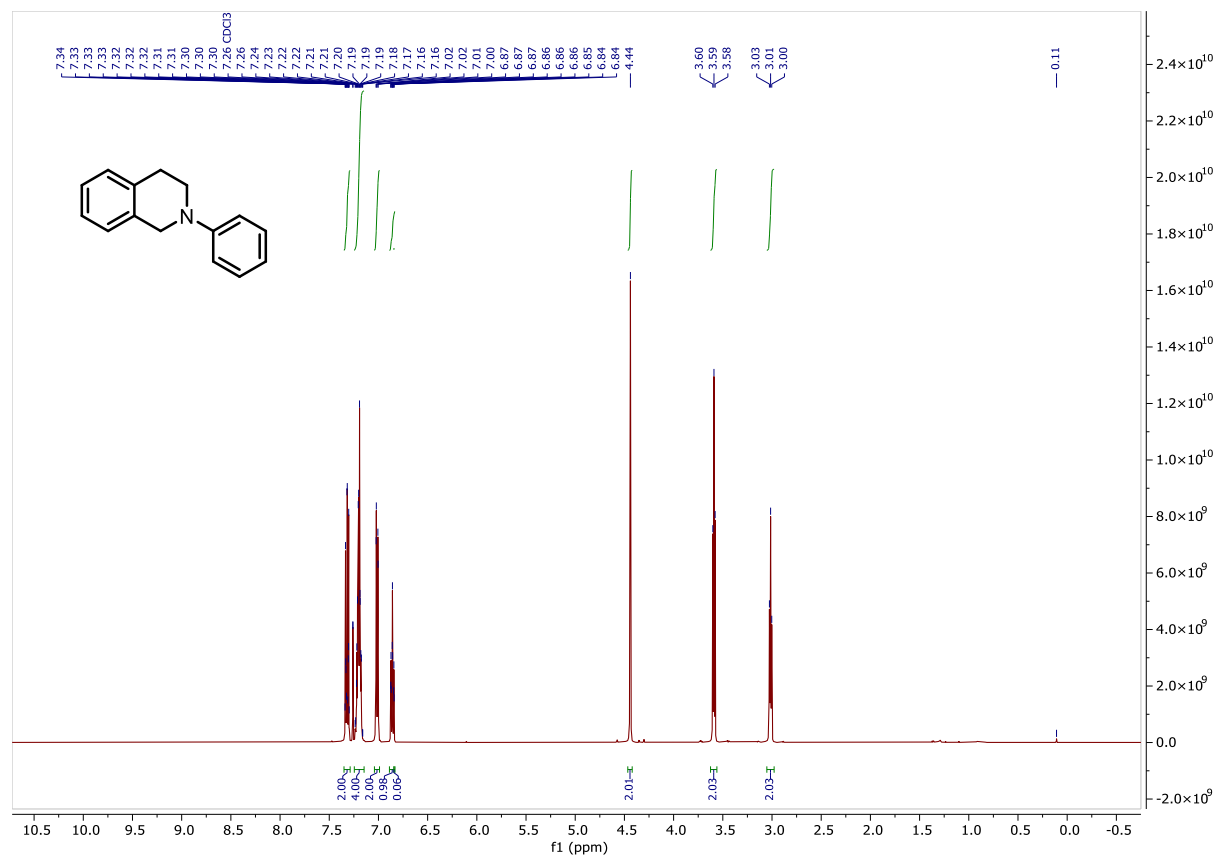

<sup>13</sup>C CDCl<sub>3</sub>

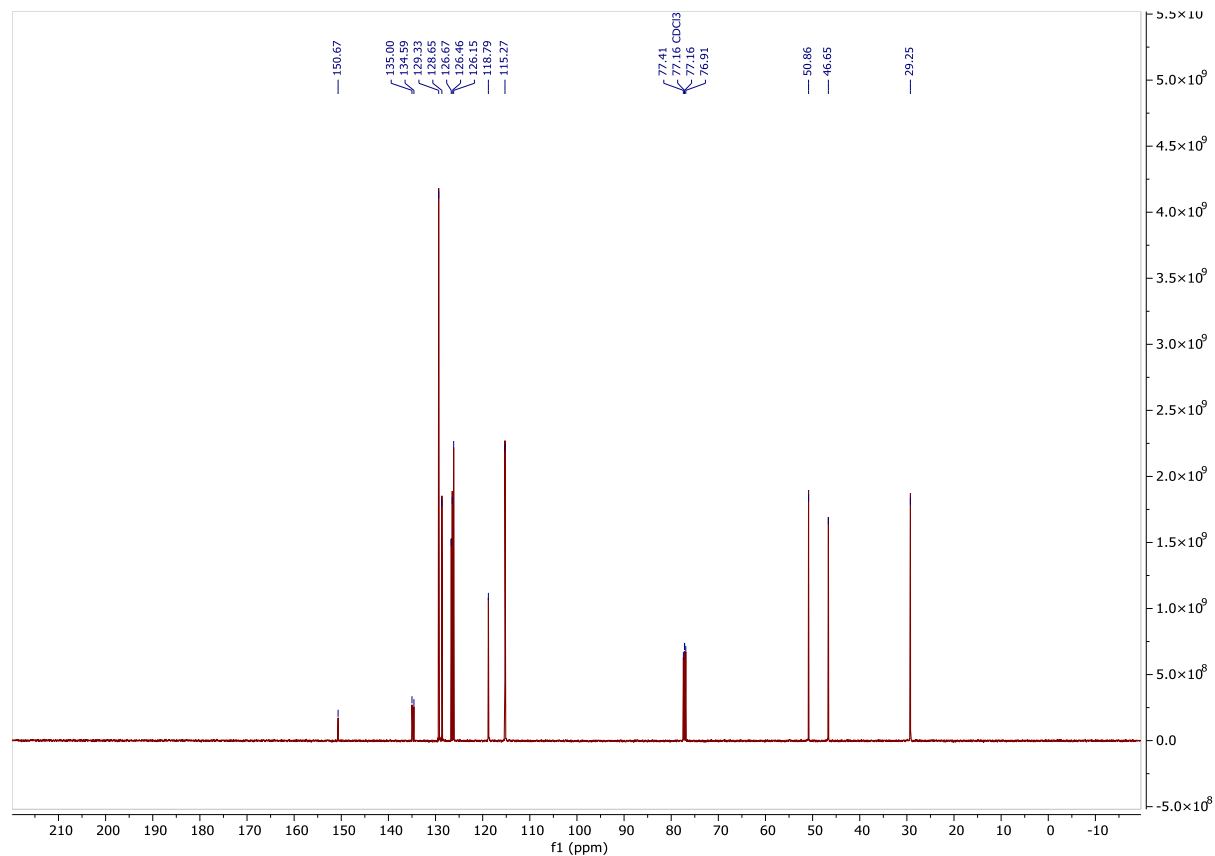

### 2-(4-Methoxyphenyl)-1,2,3,4-tetrahydroisoquinoline (1b)

$^1\text{H CDCl}_3$

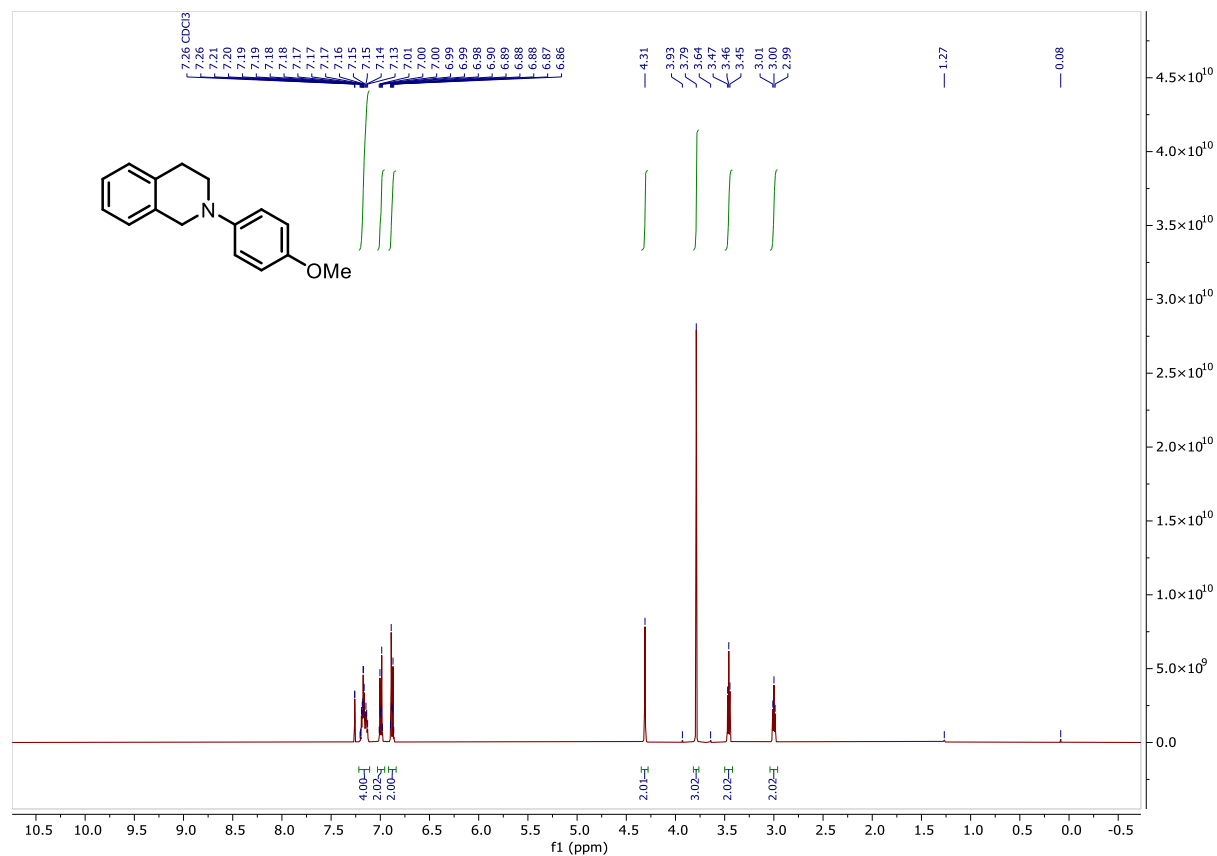

$^{13}\text{C CDCl}_3$

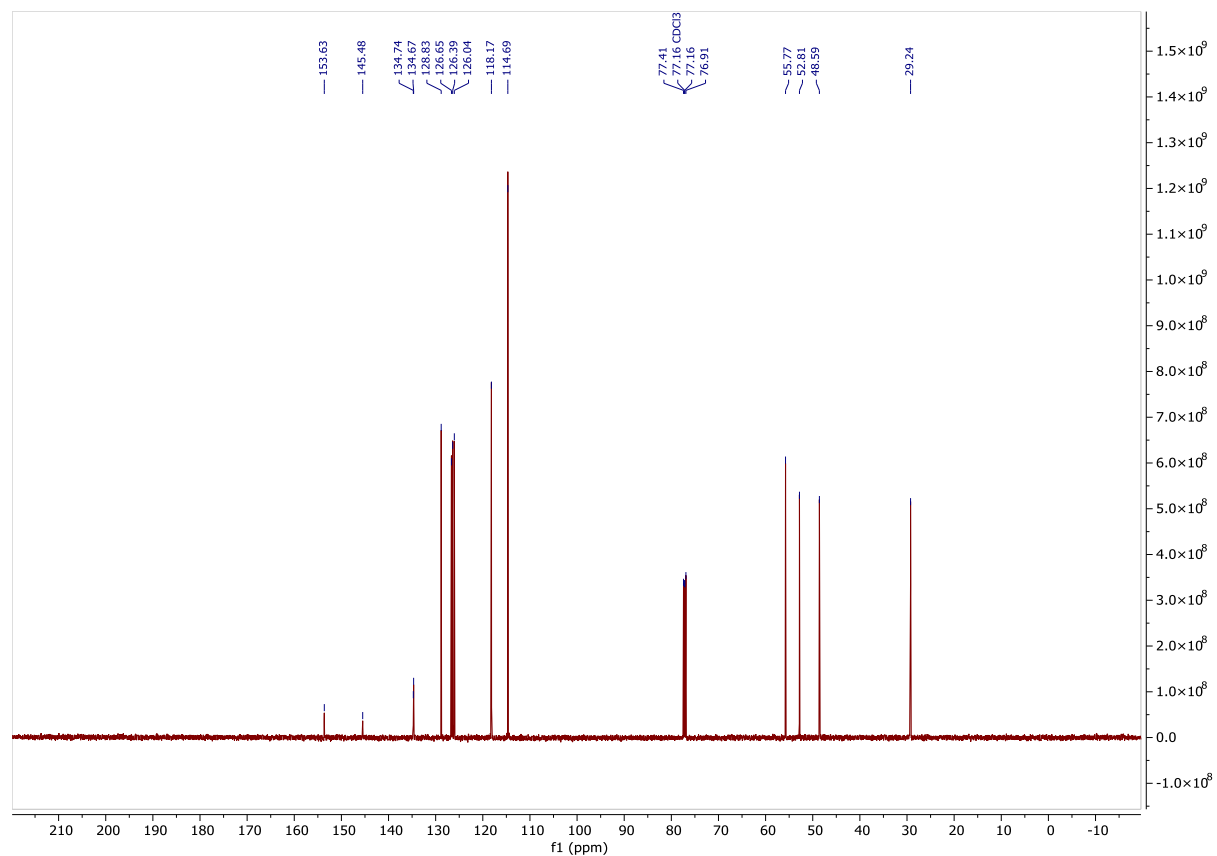

### 2-(4-fluorophenyl)-1,2,3,4-tetrahydroisoquinoline (1c)

$^1\text{H}$   $\text{CDCl}_3$

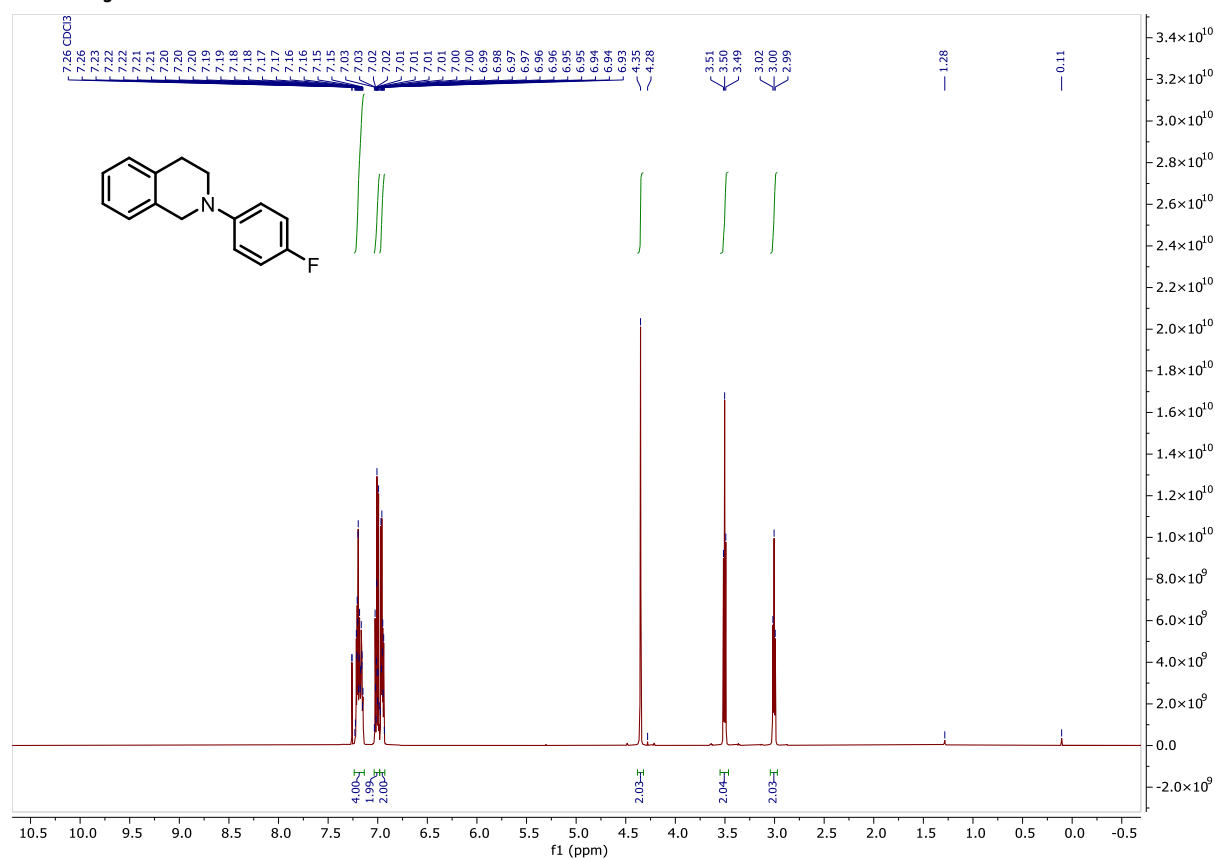

$^{13}\text{C}$   $\text{CDCl}_3$

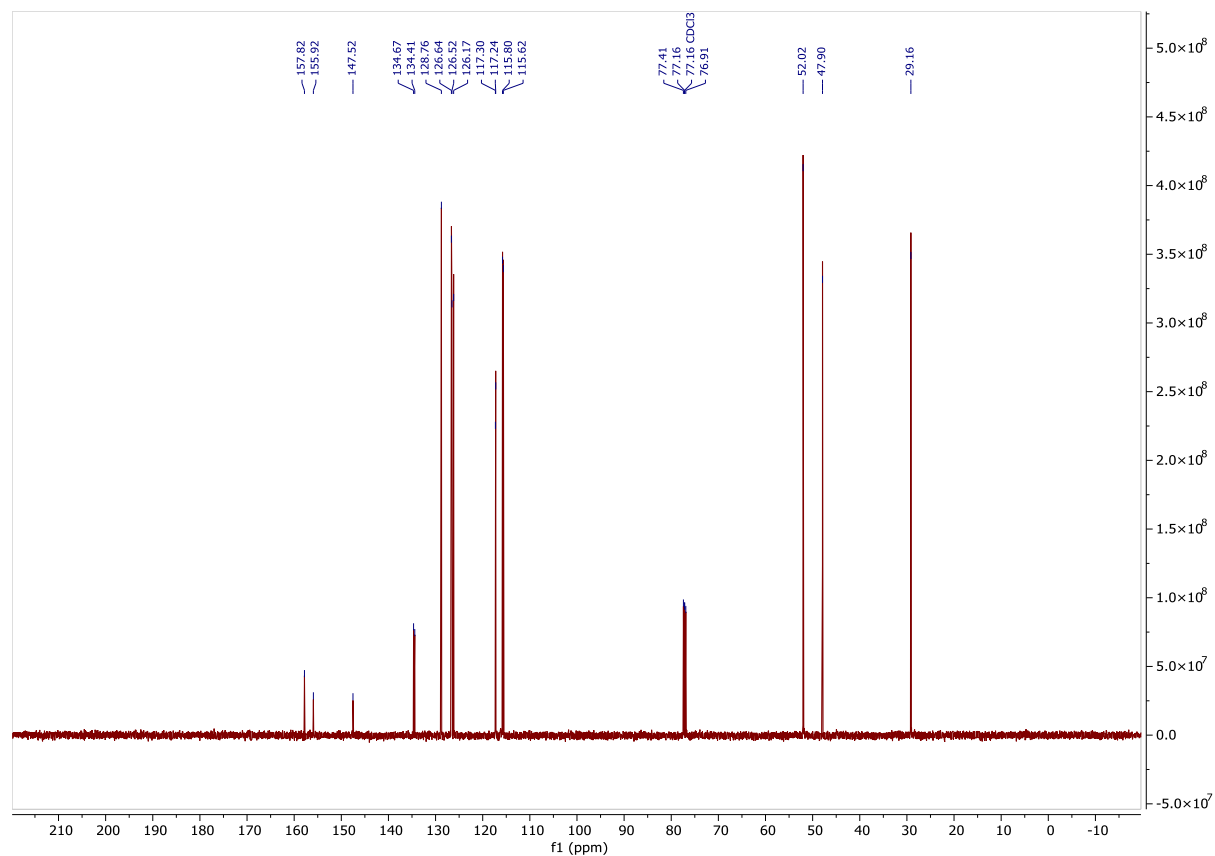

$^{19}\text{F}$   $\text{CDCl}_3$

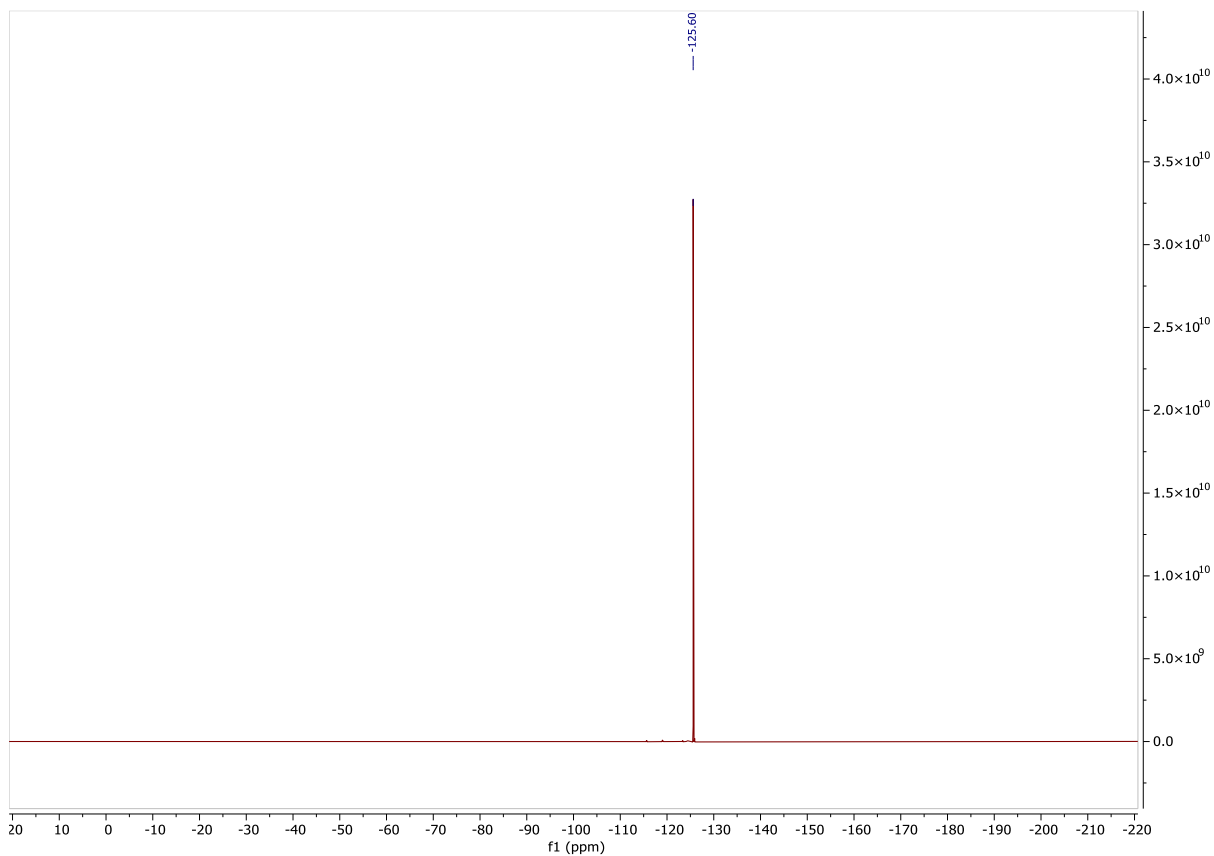

**1,1-bis(4-methoxyphenyl)ethene (3)**

$^1\text{H}$   $\text{CDCl}_3$

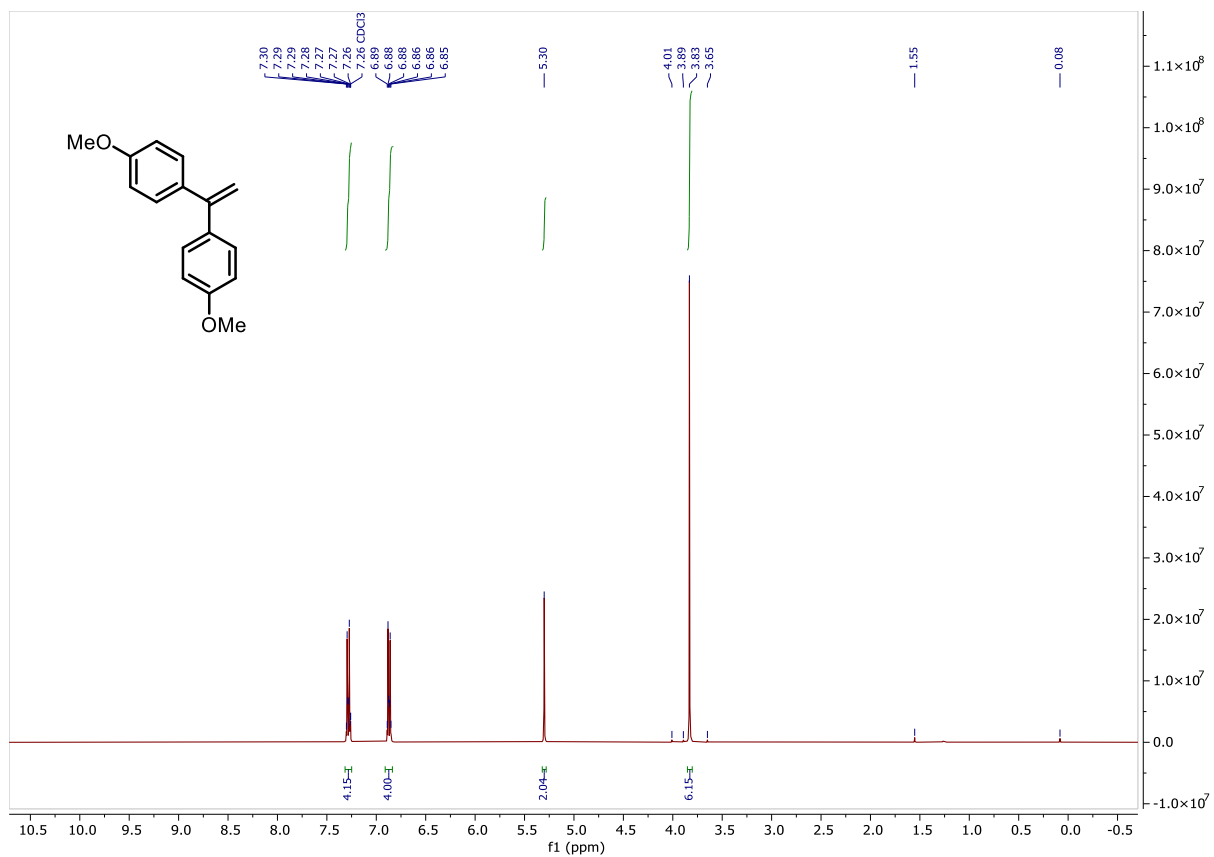

$^{13}\text{C}$   $\text{CDCl}_3$

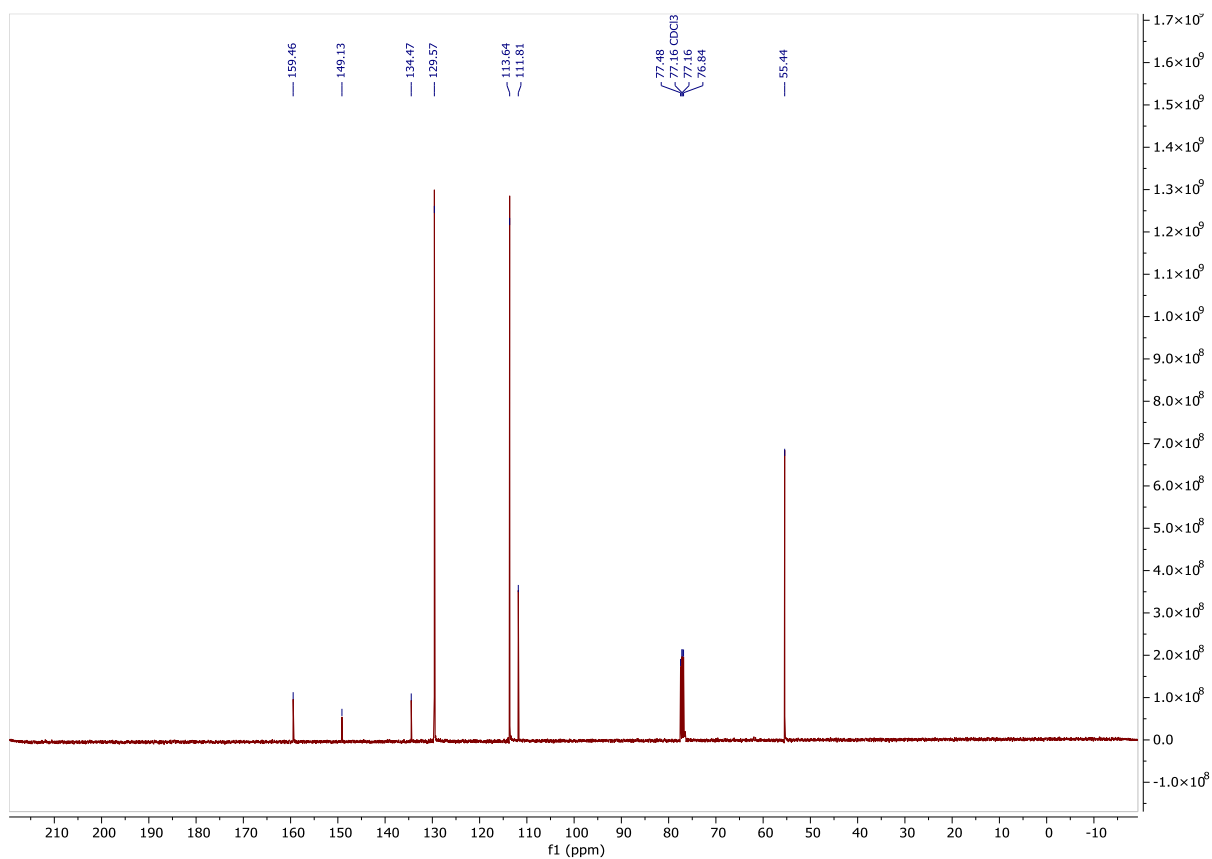

**(Benzoylmethylene)triphenylphosphorane (7)**

$^1\text{H}$  CDCl<sub>3</sub>

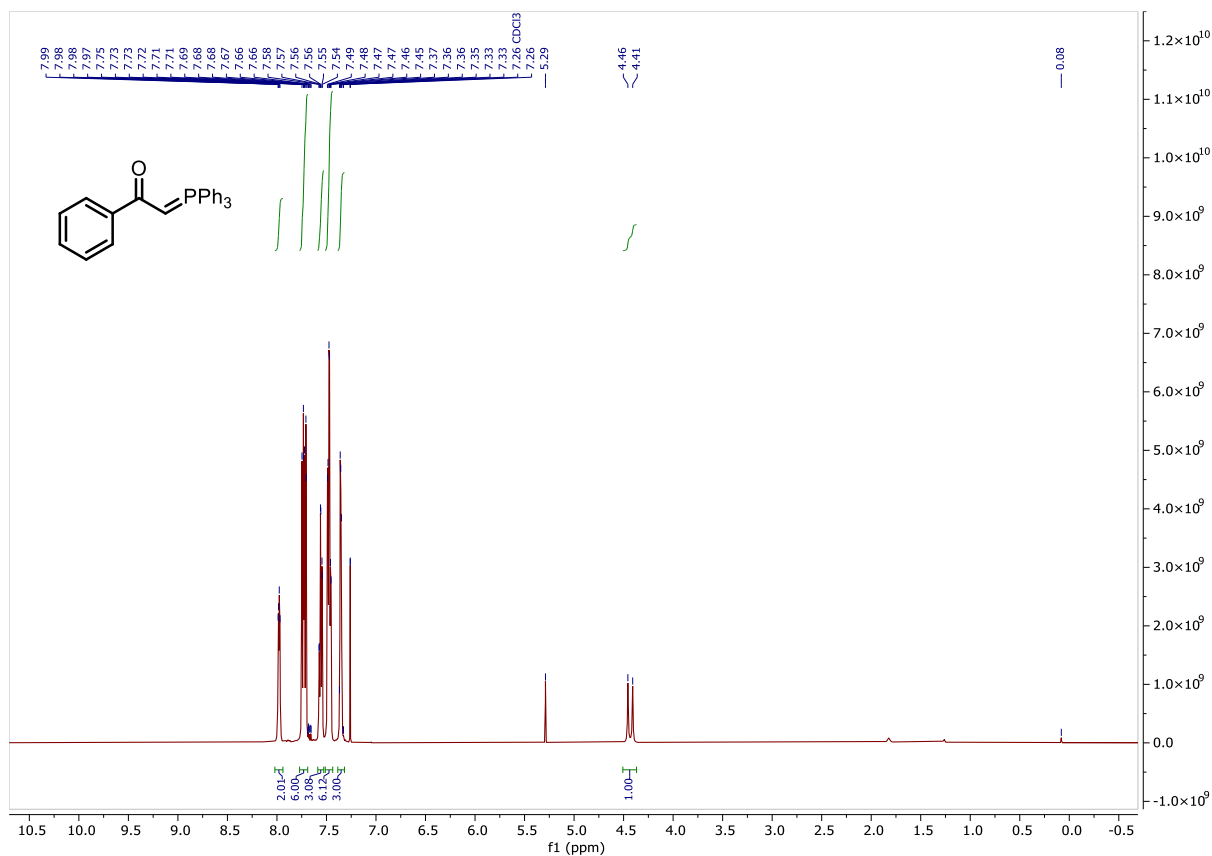

$^{13}\text{C}$  CDCl<sub>3</sub>

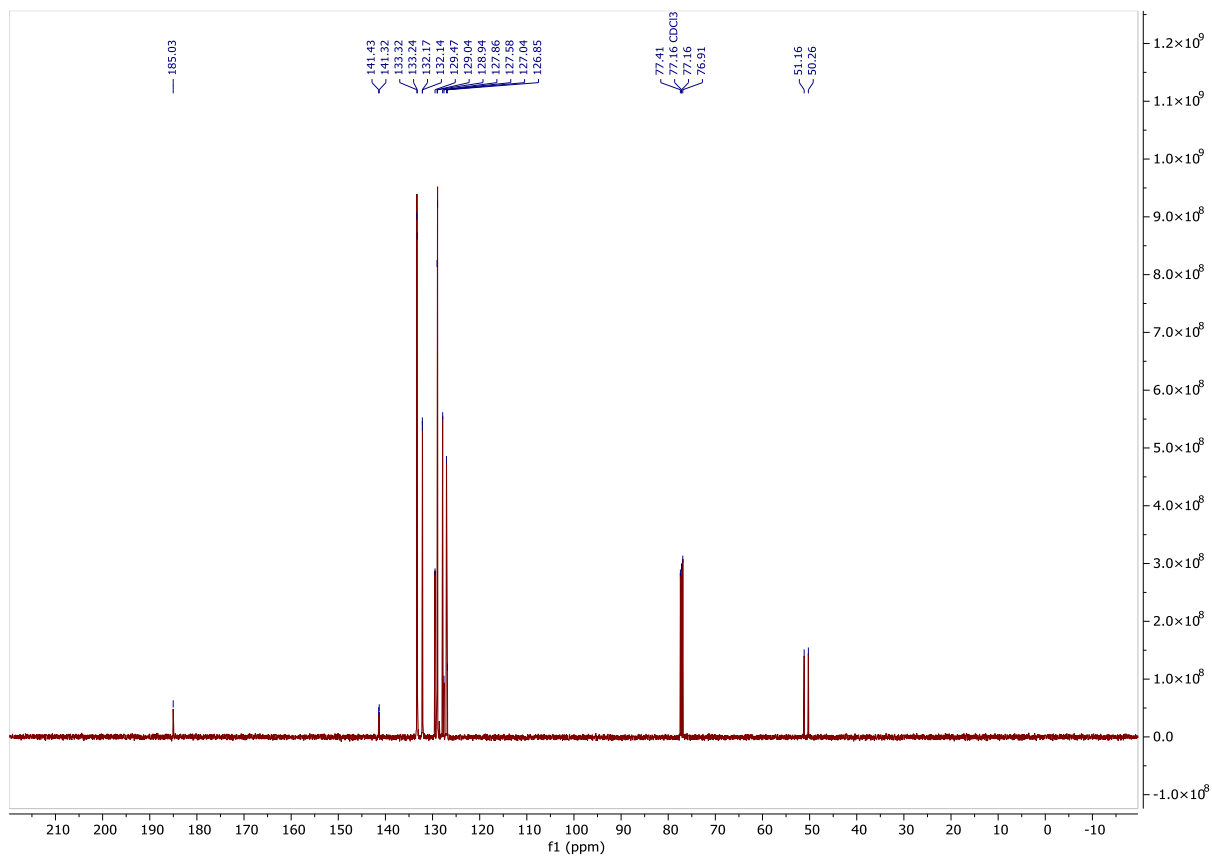

$^{31}\text{P}$  CDCl<sub>3</sub>

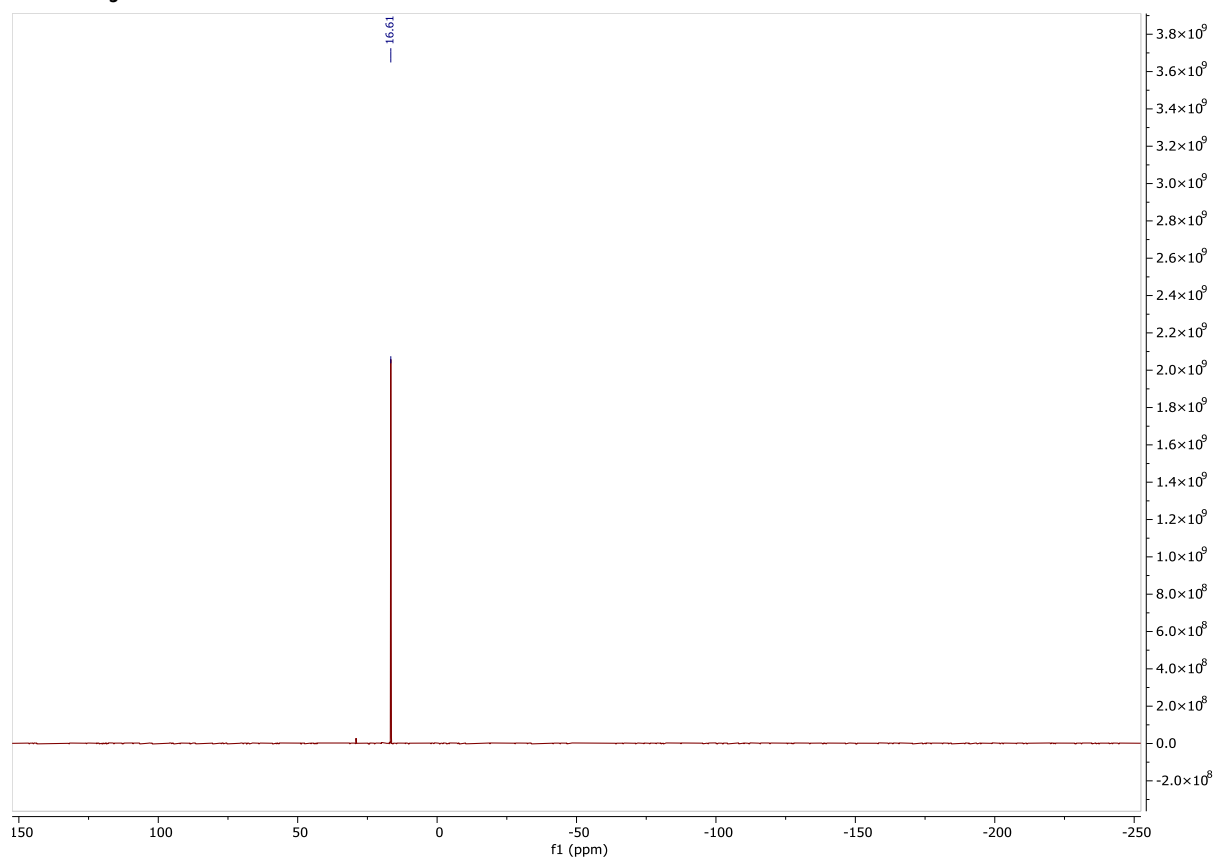

# 1-(nitromethyl)-2-phenyl-1,2,3,4-tetrahydroisoquinoline (2a)

$^1\text{H CDCl}_3$

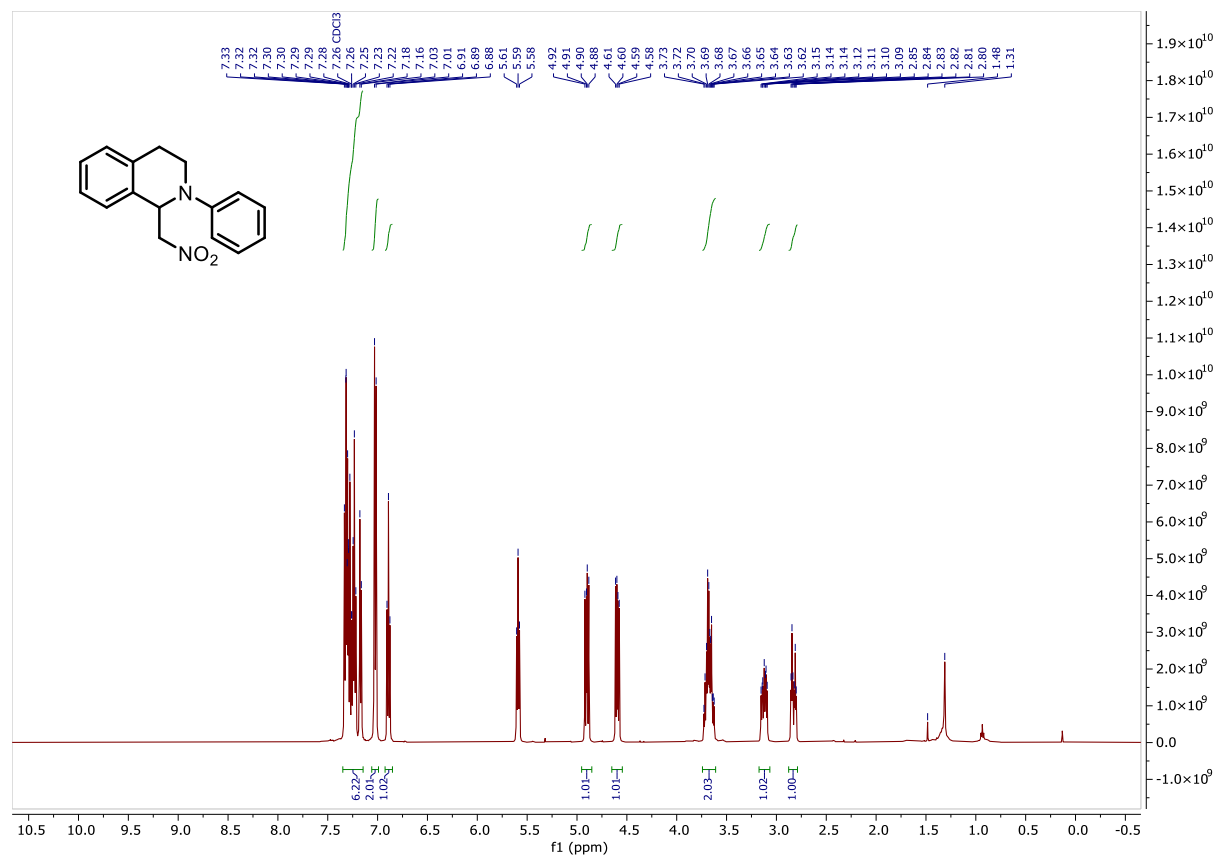

$^{13}\text{C CDCl}_3$

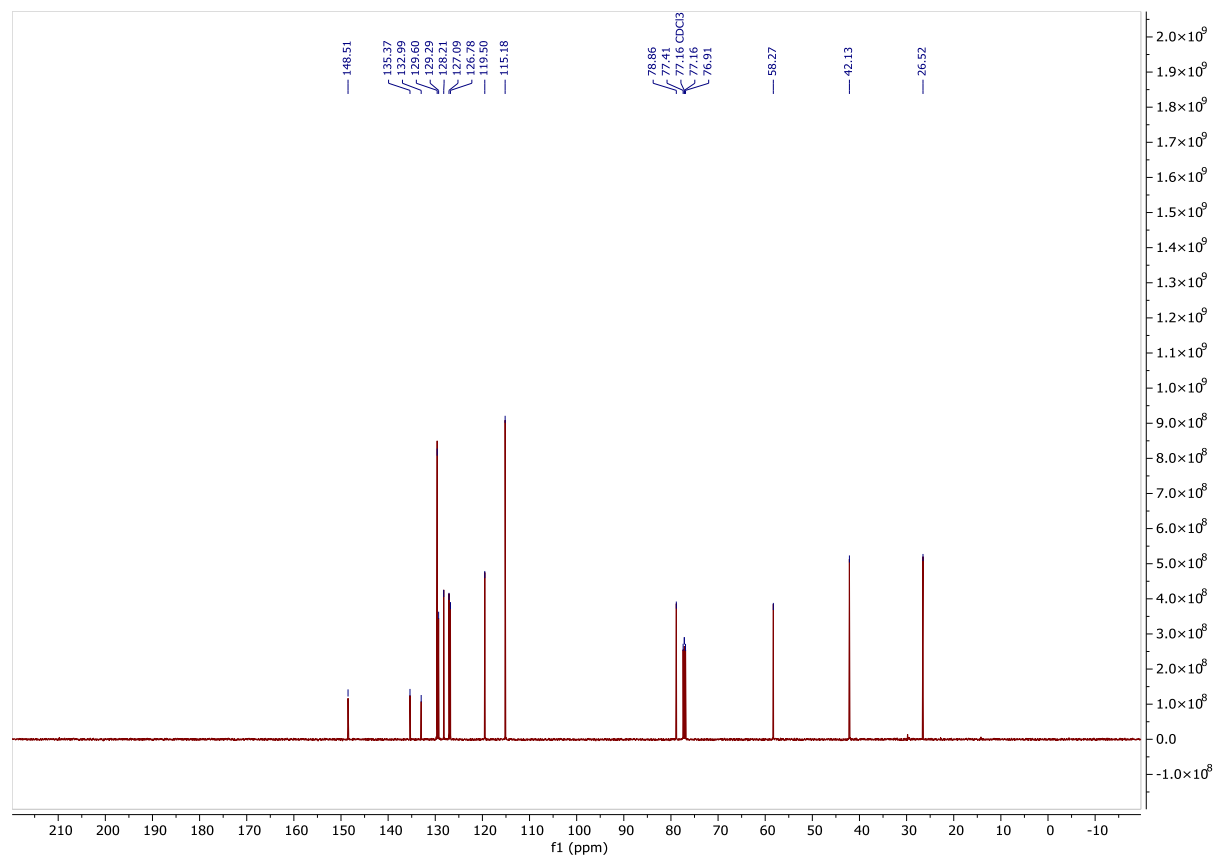



### 2-(4-methoxyphenyl)-1-(nitromethyl)-1,2,3,4-tetrahydroisoquinoline (2b)

$^1\text{H CDCl}_3$

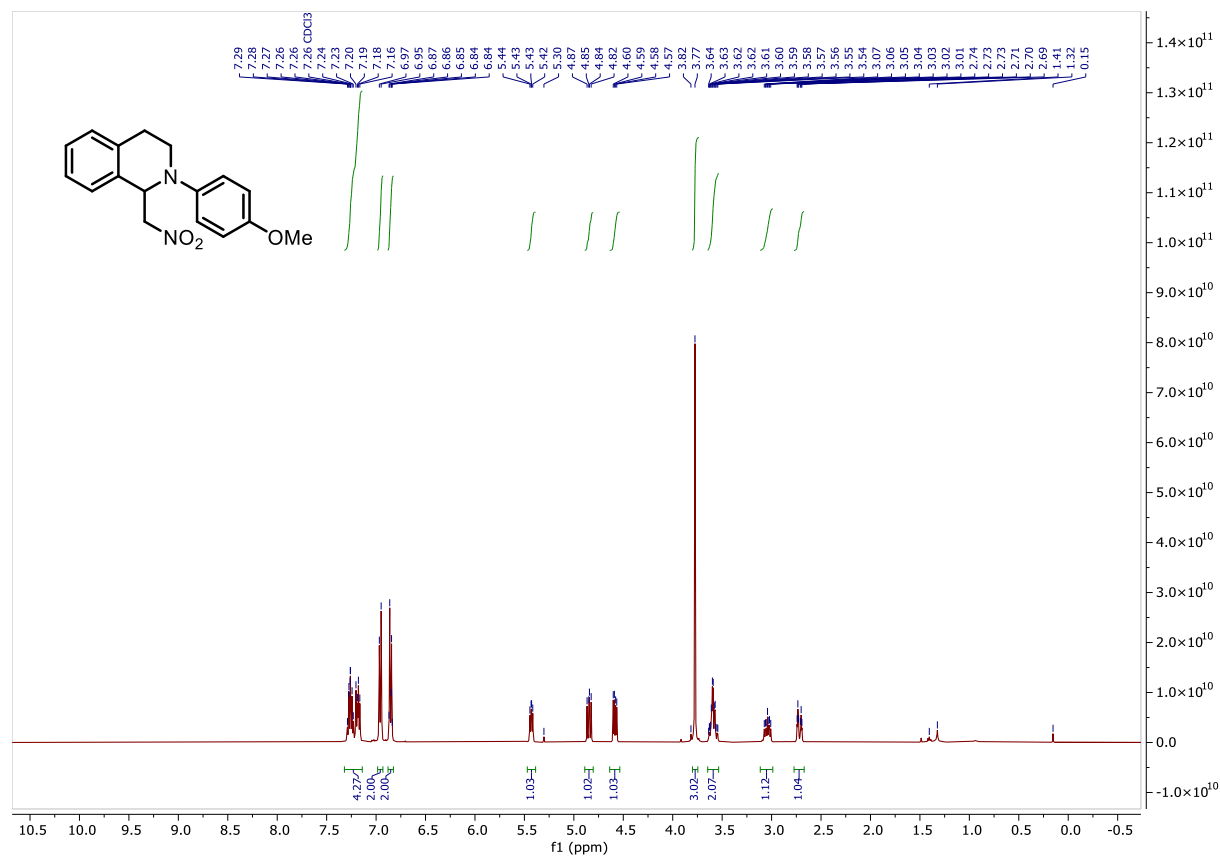

$^{13}\text{C CDCl}_3$

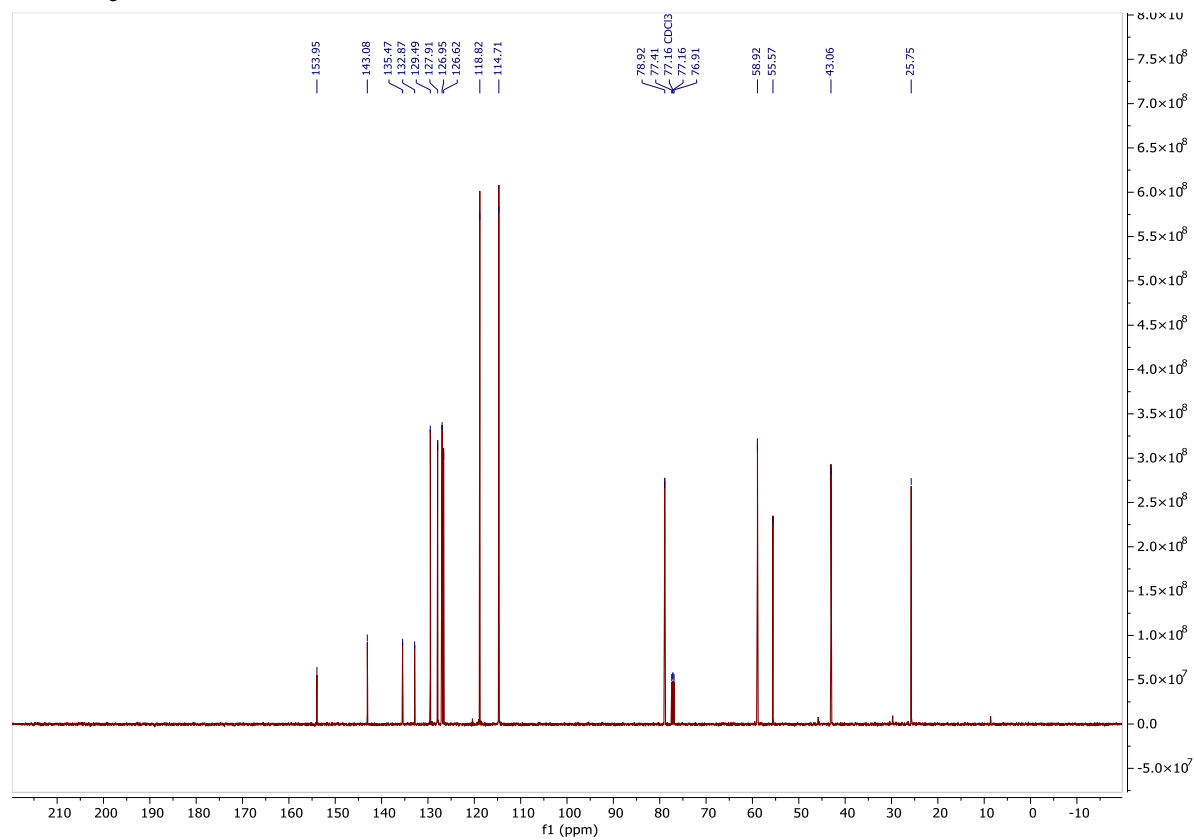

### 2-(4-fluorophenyl)-1-(nitromethyl)-1,2,3,4-tetrahydroisoquinoline (2c)

<sup>1</sup>H CDCl<sub>3</sub>

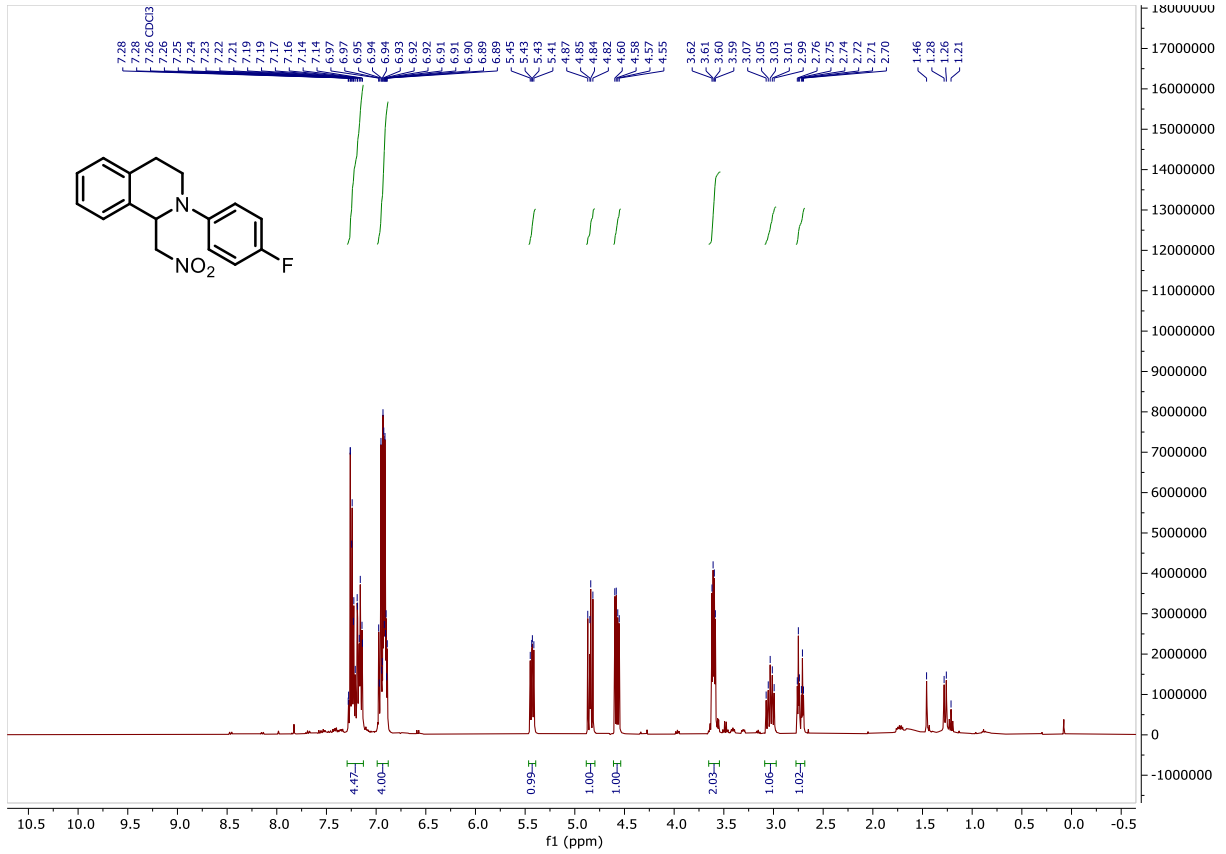

<sup>13</sup>C CDCl<sub>3</sub>

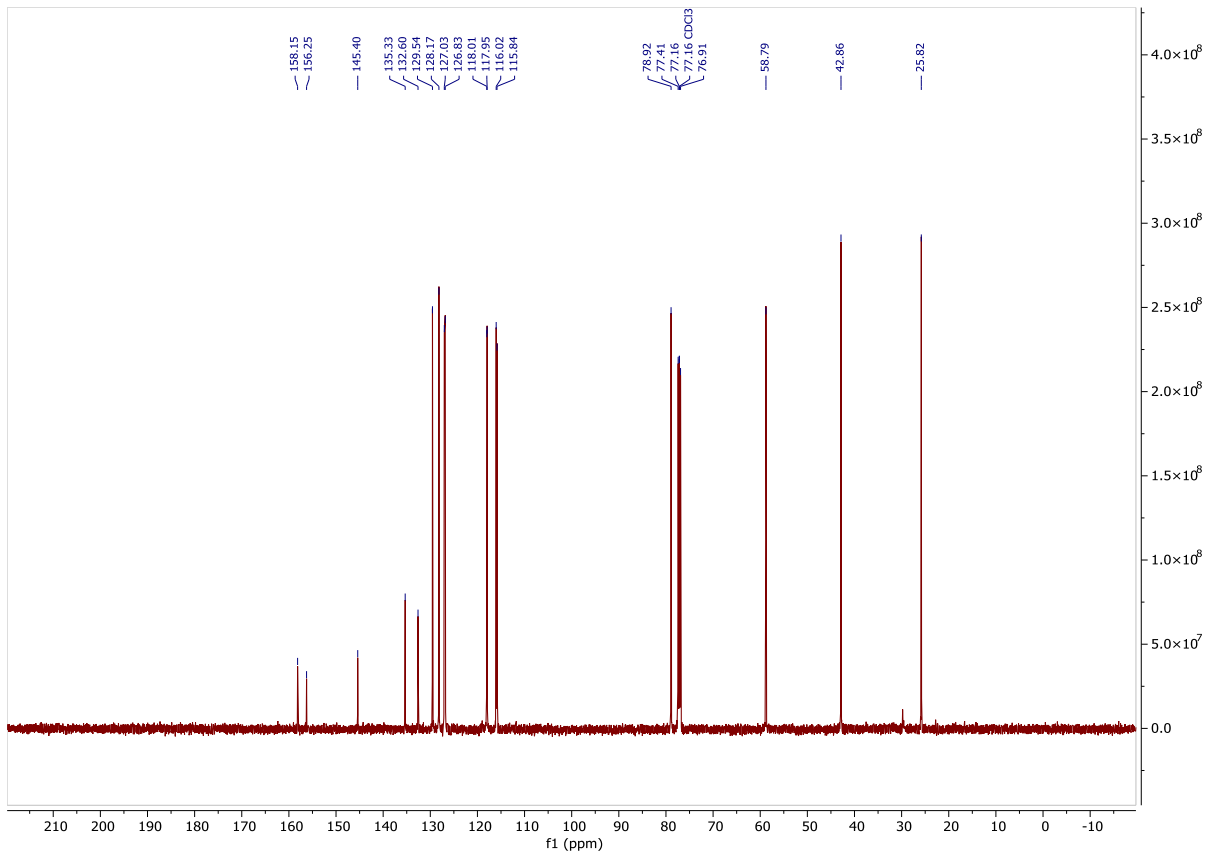

<sup>19</sup>F CDCl<sub>3</sub>

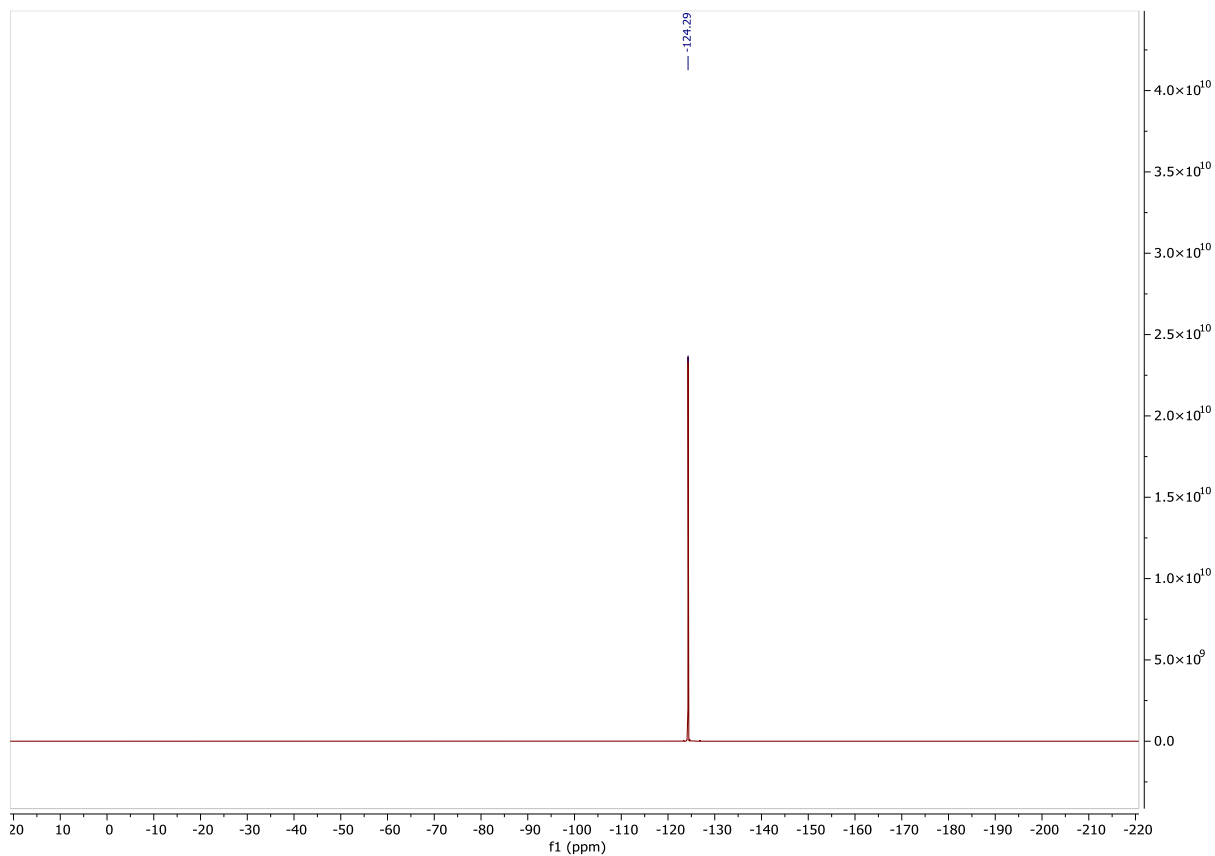

**2-(4-methoxyphenyl)-1,2,3,4-tetrahydroisoquinoline-1-carbonitrile (2d)**

$^1\text{H}$   $\text{CDCl}_3$

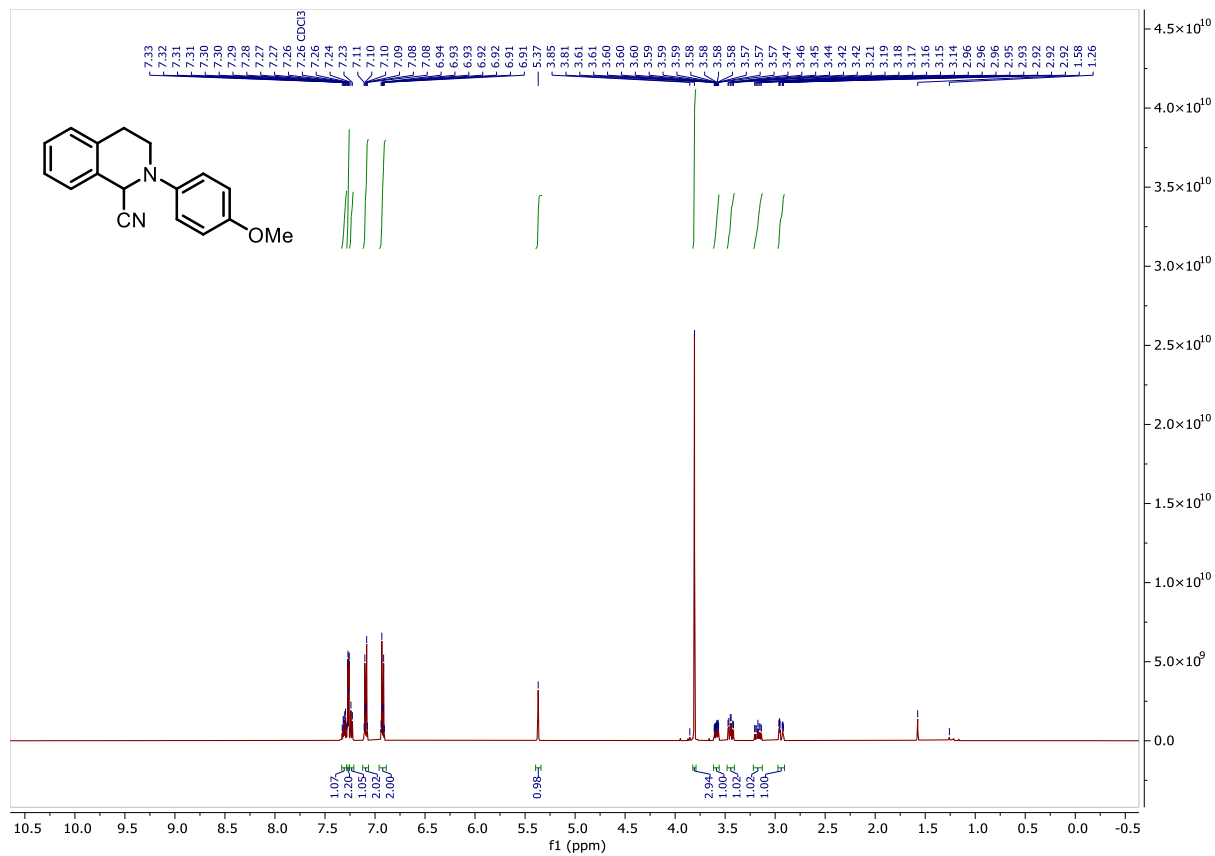

<sup>13</sup>C CDCl<sub>3</sub>

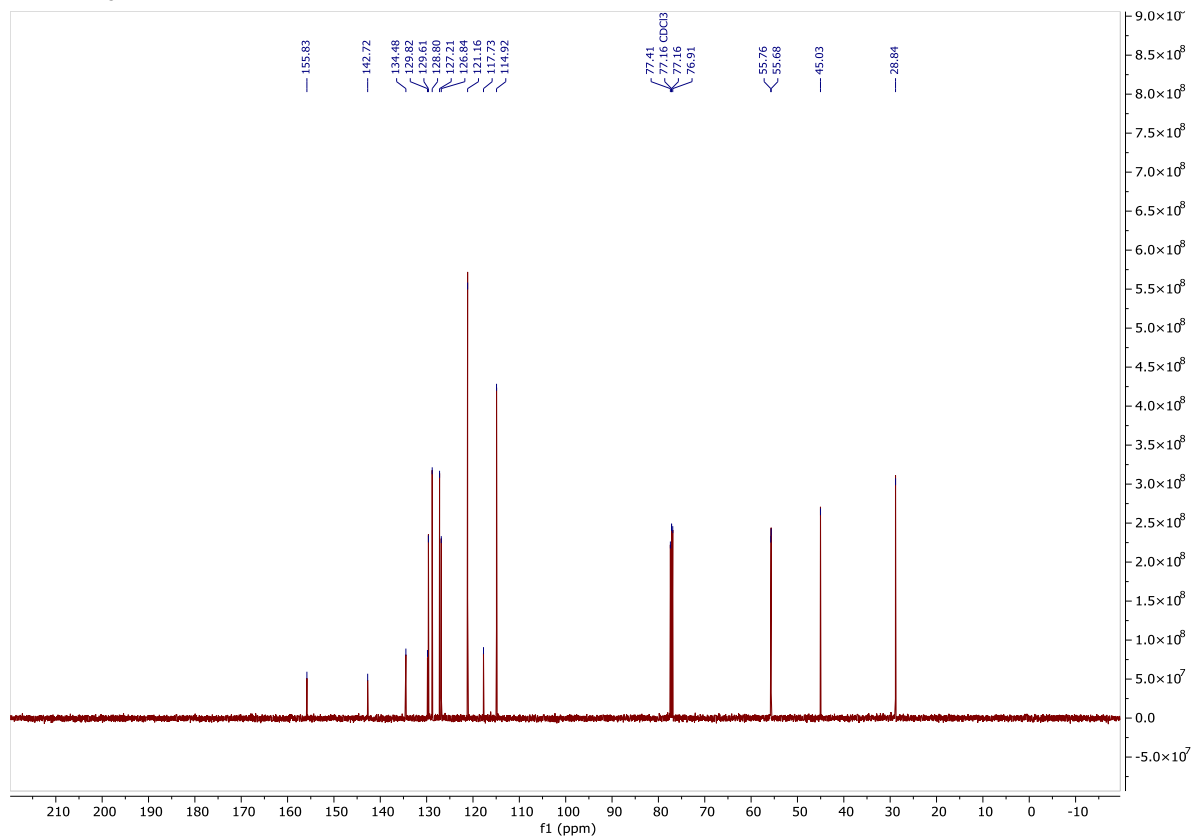

diethyl (2-(4-methoxyphenyl)-1,2,3,4-tetrahydroisoquinolin-1-yl)phosphonate (2 h)

<sup>1</sup>H CDCl<sub>3</sub>

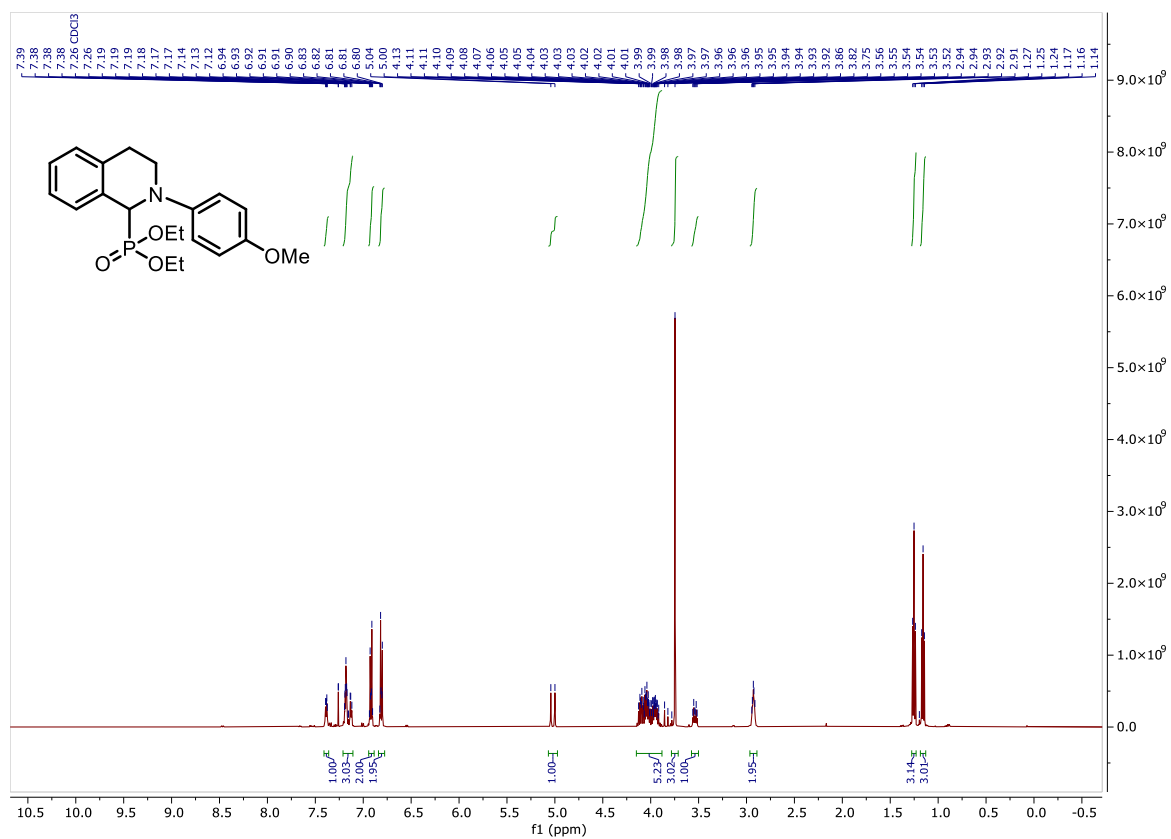

<sup>13</sup>C CDCl<sub>3</sub>

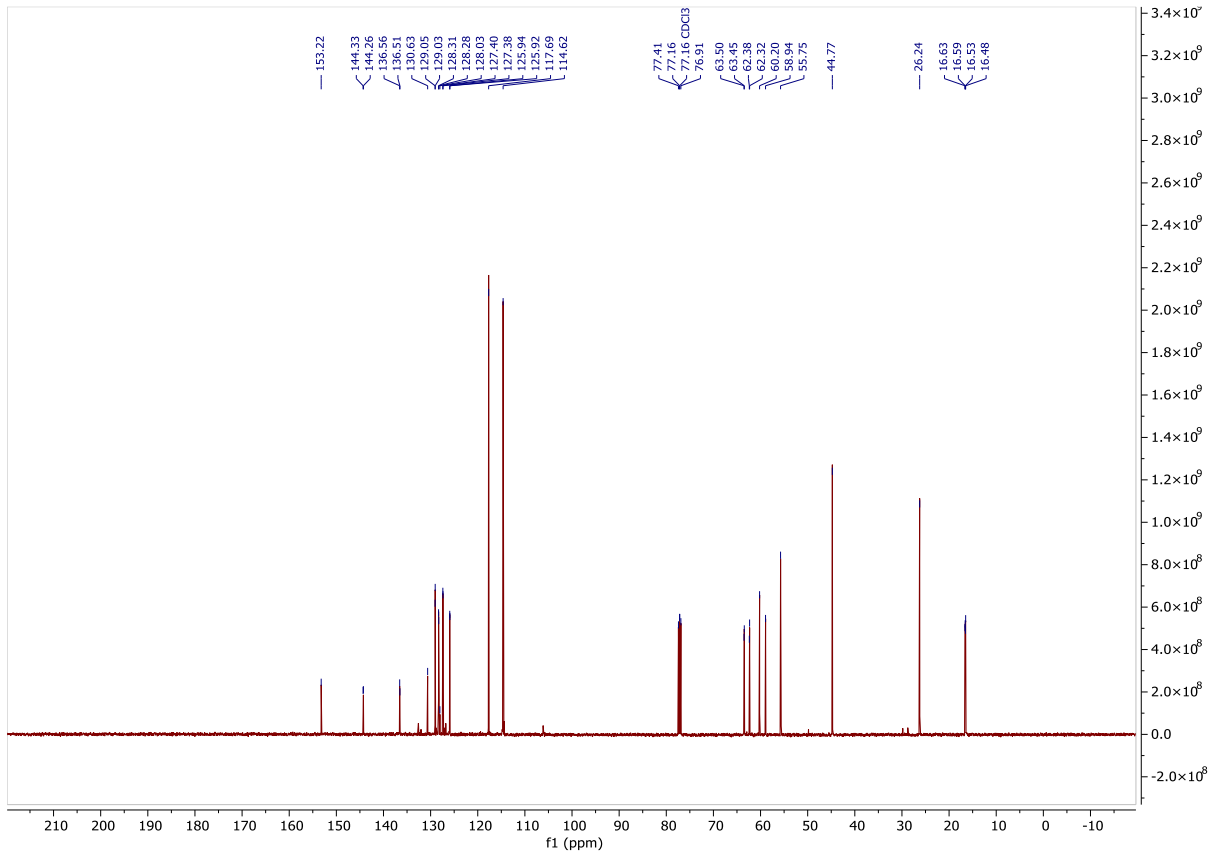

**<sup>31</sup>P CDCl<sub>3</sub>**

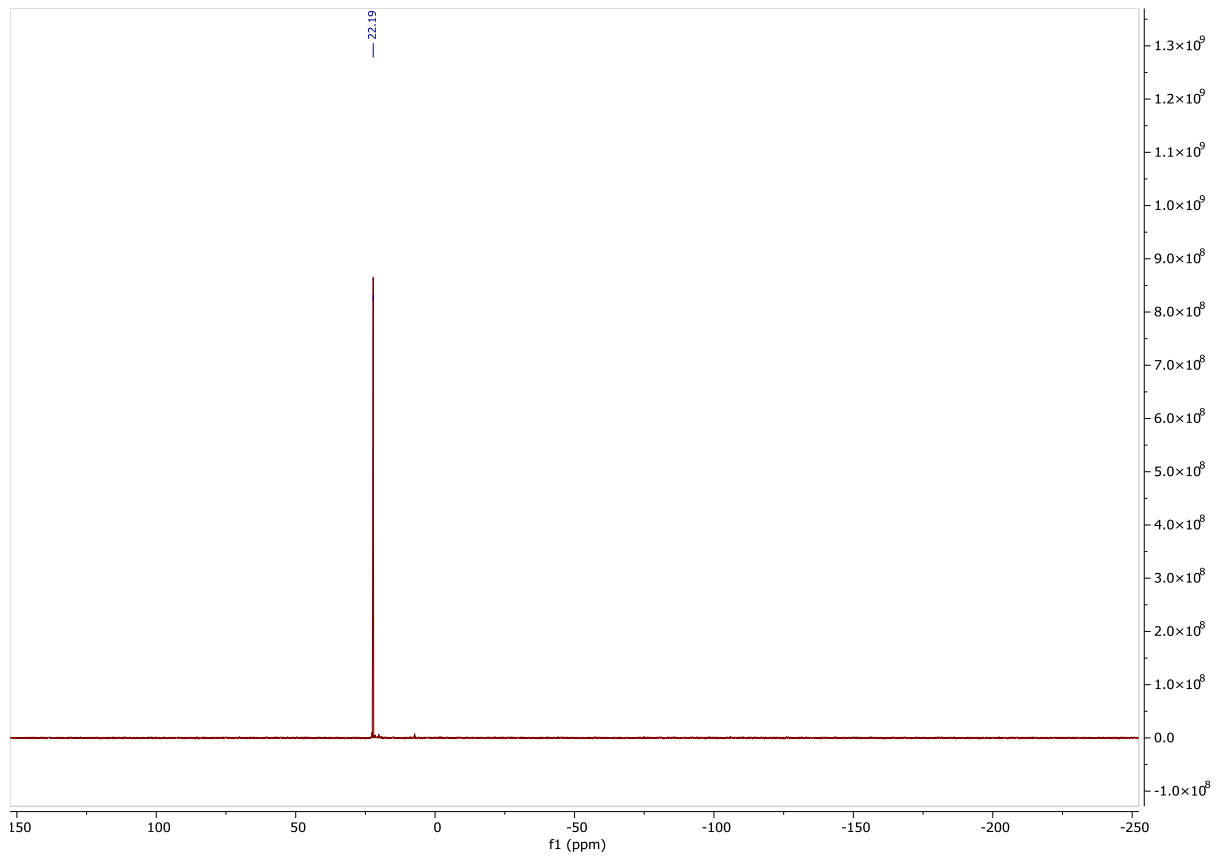

## 2-(4-methoxyphenyl)-1-(phenylethynyl)-1,2,3,4-tetrahydroisoquinoline (2f)

$^1\text{H}$   $\text{CDCl}_3$

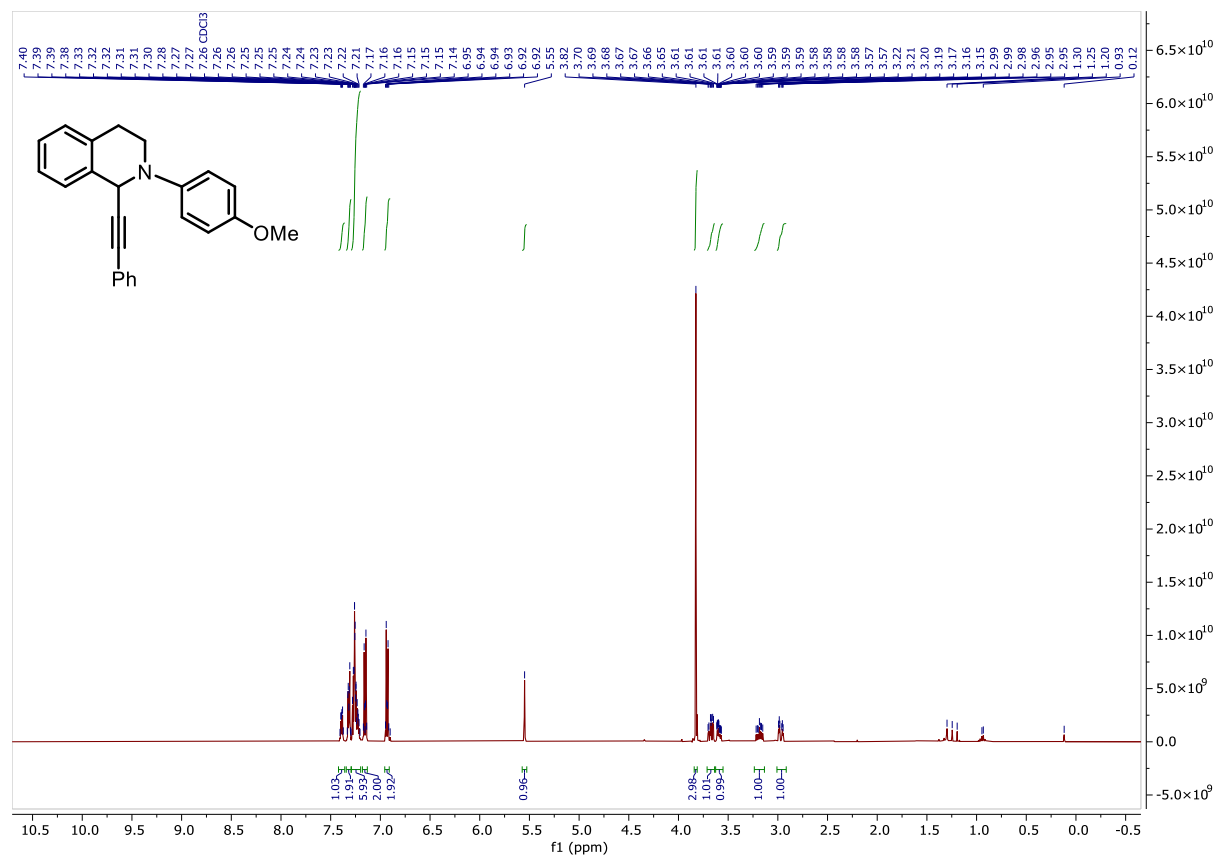

$^{13}\text{C}$   $\text{CDCl}_3$

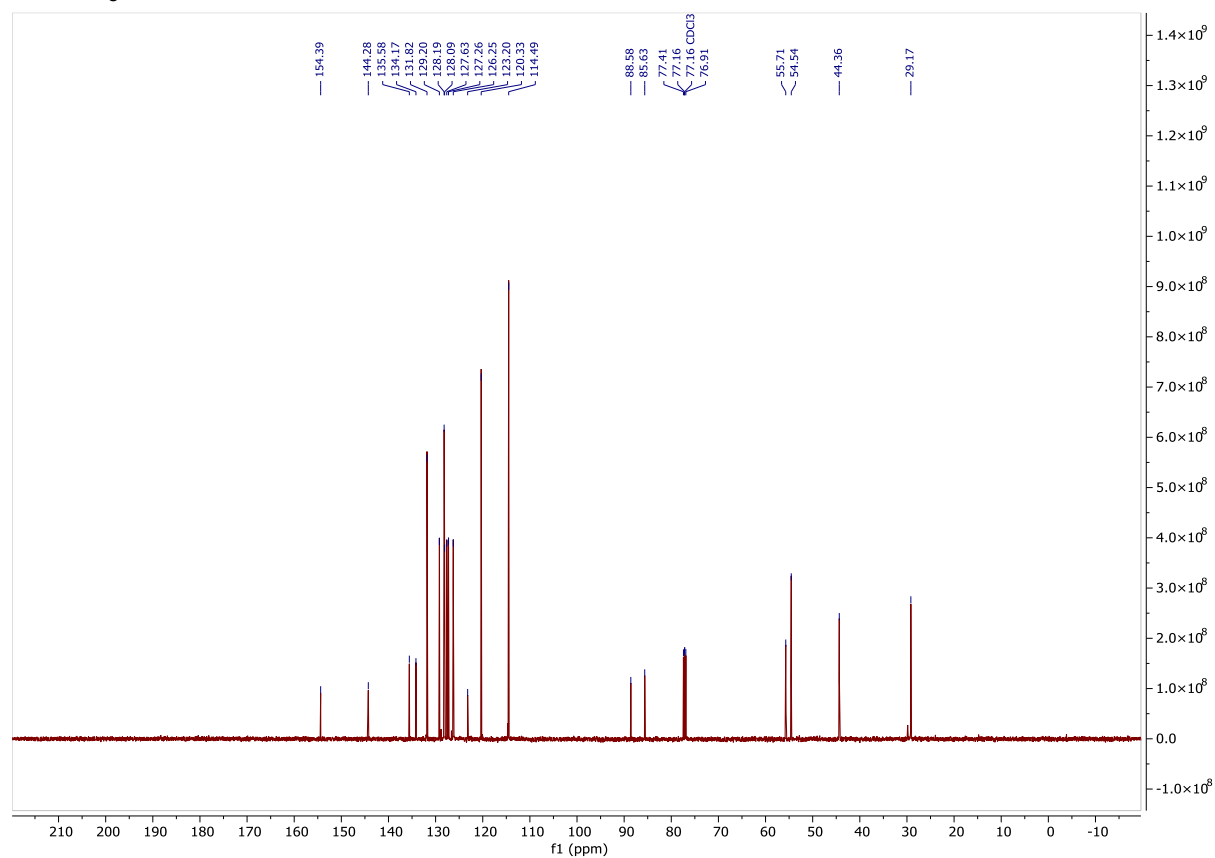

### 5-Methyl-2-phenyl-3a,4,5,9b-tetrahydro-1H-pyrrolo[3,4-c]quinoline-1,3(2H)-dione (5)

<sup>1</sup>H CDCl<sub>3</sub>

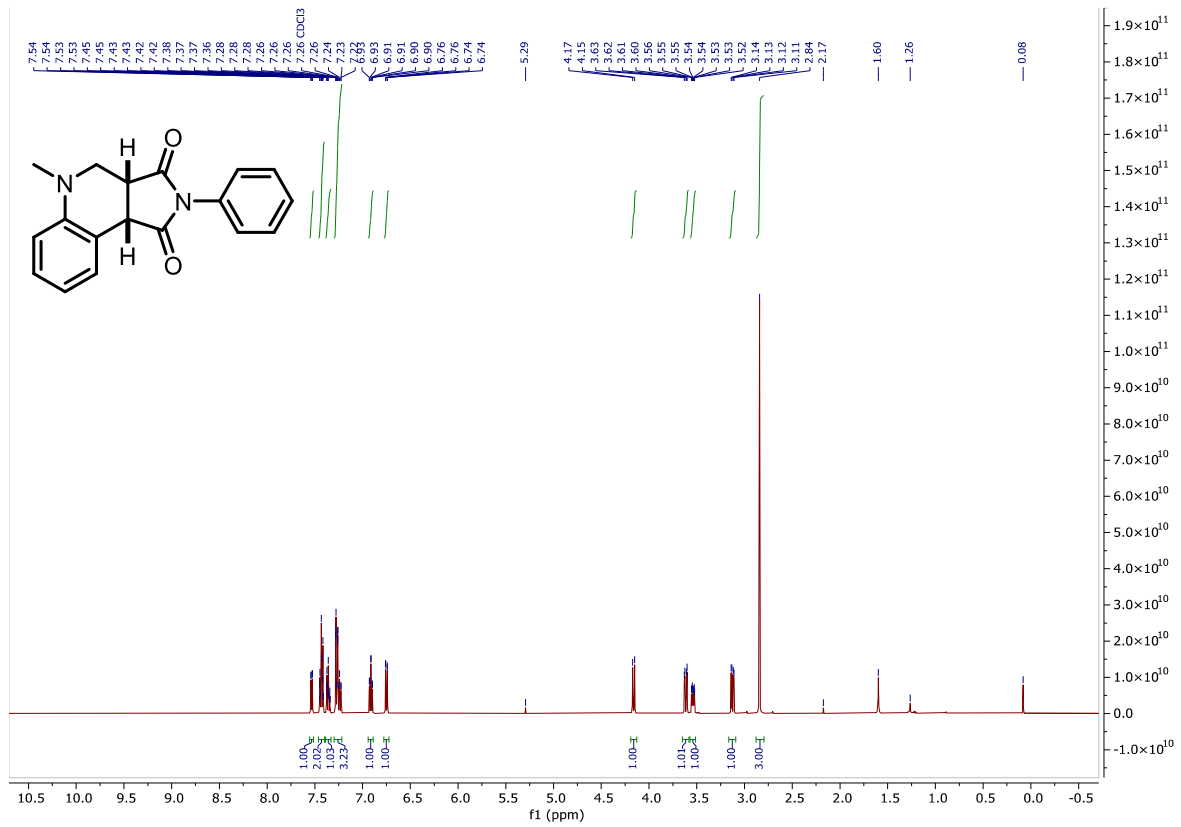

<sup>13</sup>C CDCl<sub>3</sub>

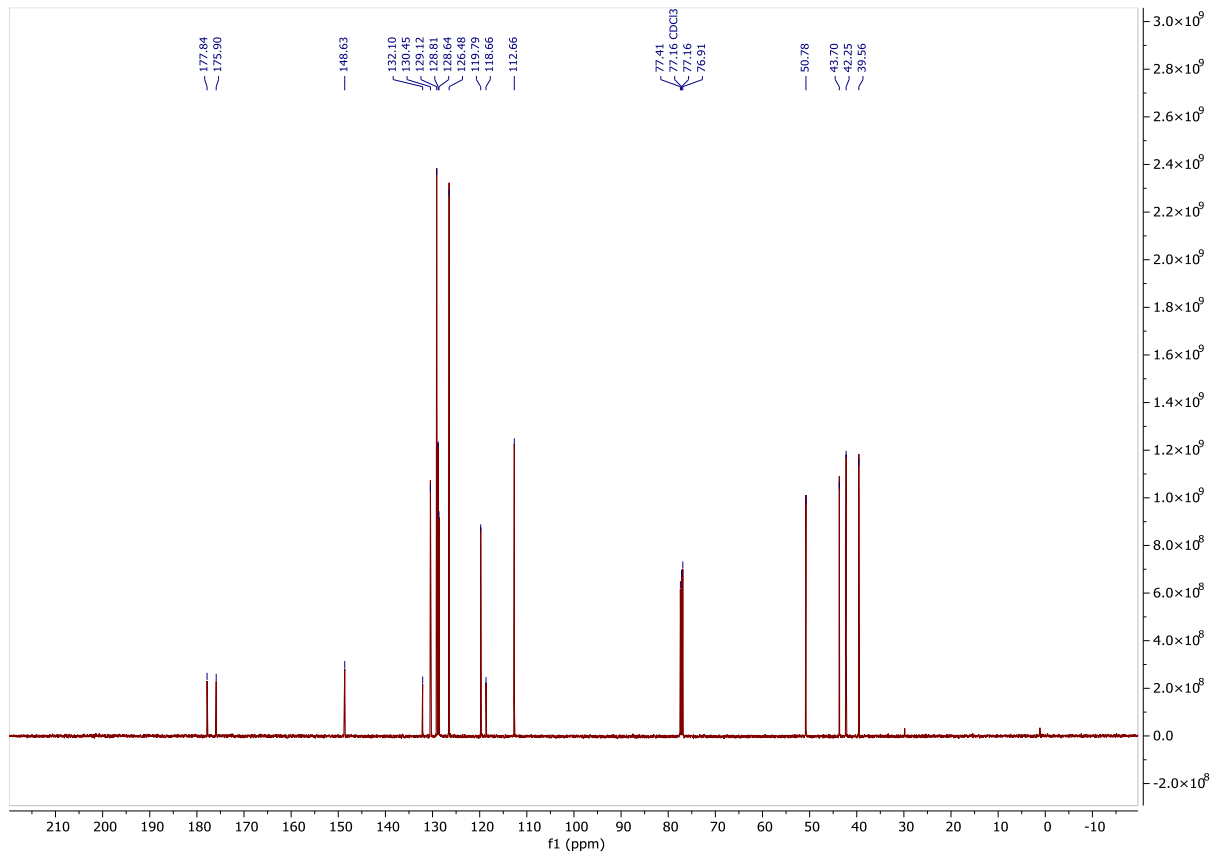

**(E)-1,4-diphenylbut-2-ene-1,4-dione (10)**

<sup>1</sup>H CDCl<sub>3</sub>

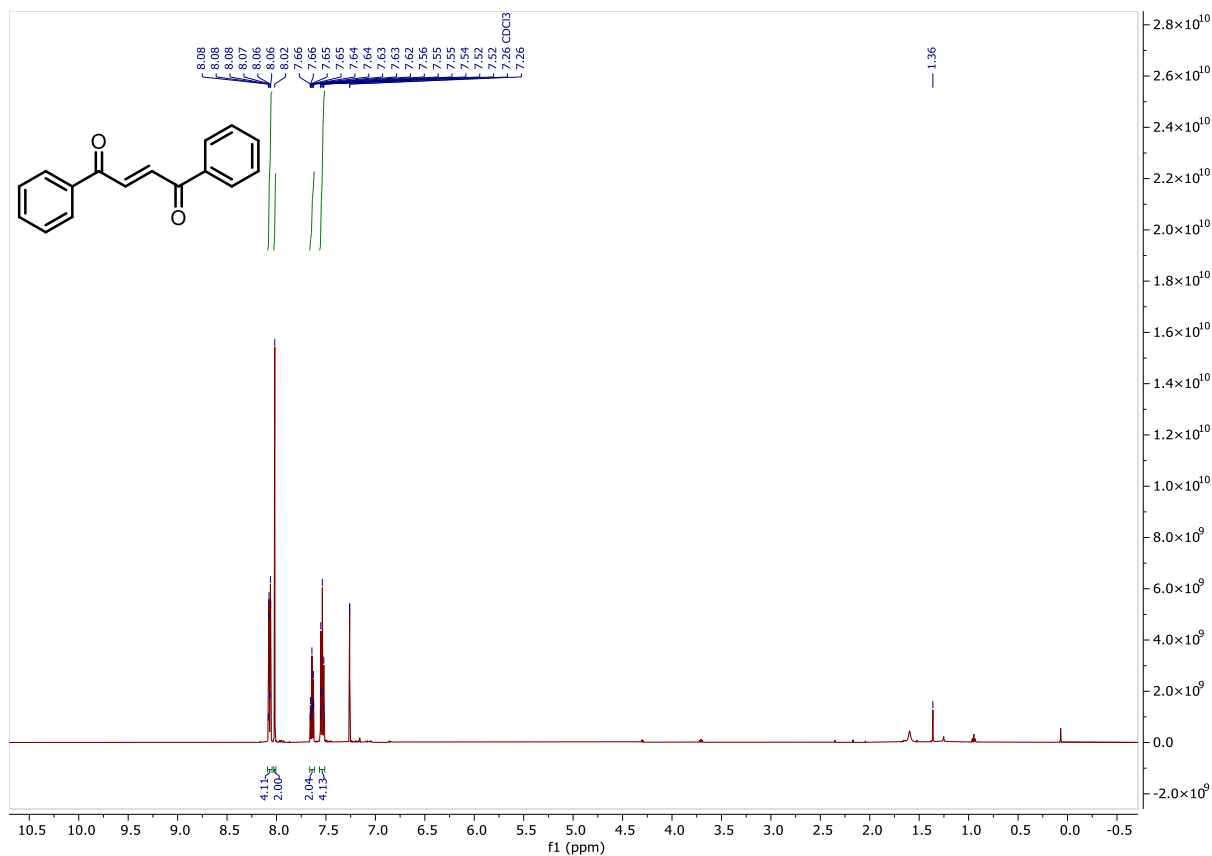

<sup>13</sup>C CDCl<sub>3</sub>

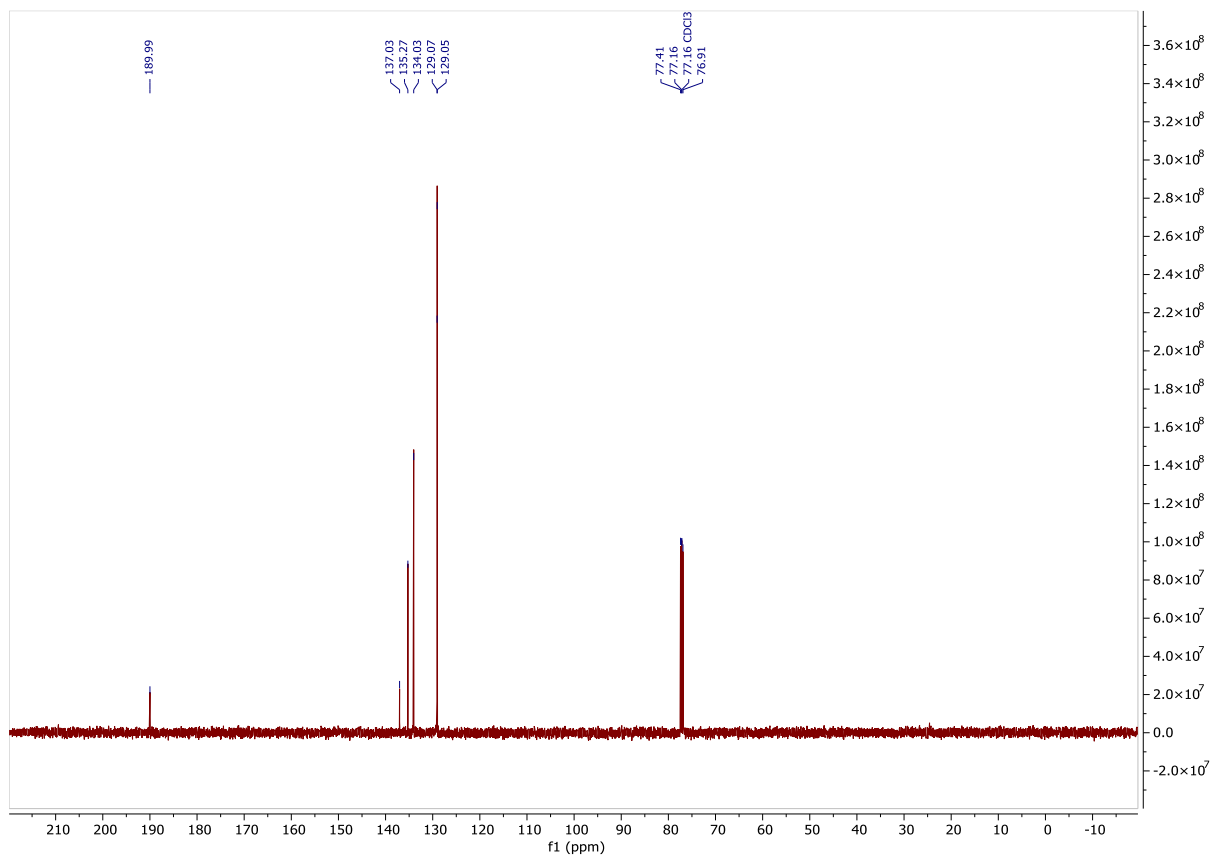



**4,4'-(3,3,3-trifluoroprop-1-ene-1,1-diyl)bis(methoxybenzene)**

<sup>1</sup>H DMSO-d<sub>6</sub> (durene as standard)

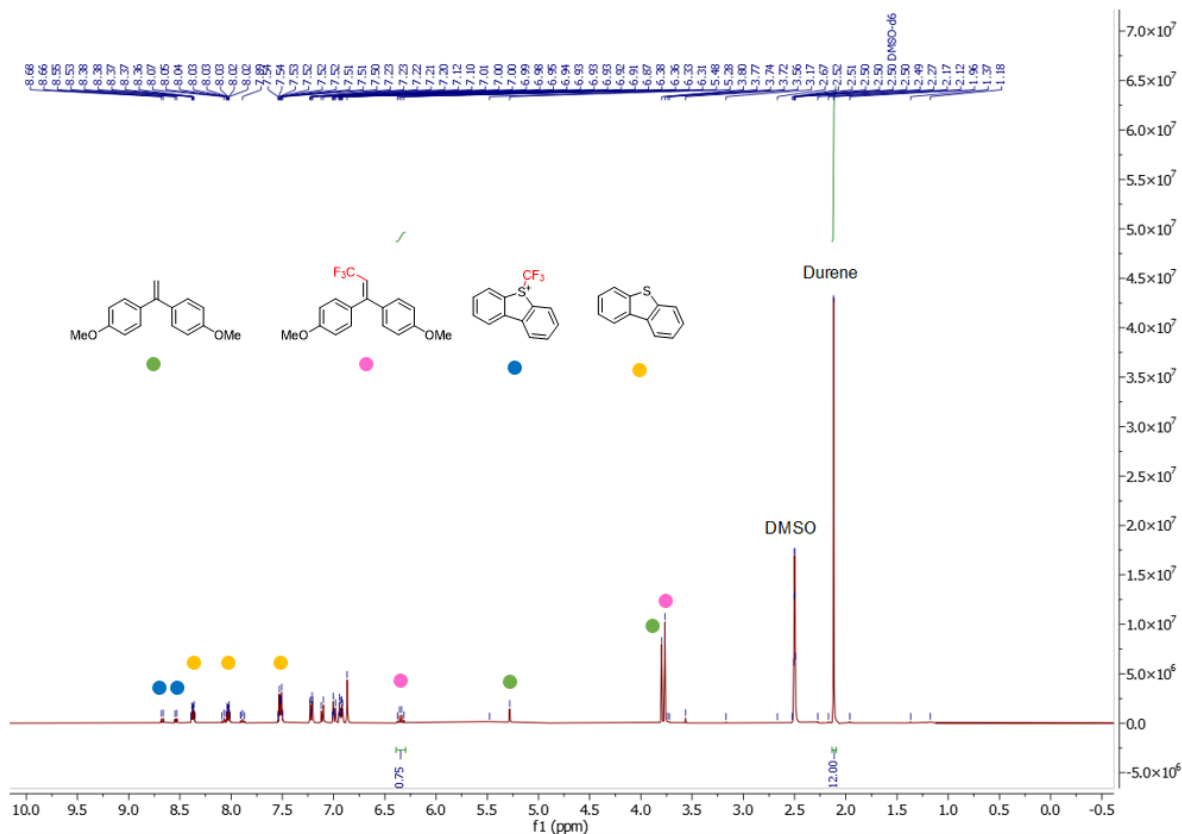

**4,4'-(3,3,3-trifluoroprop-1-ene-1,1-diyl)bis(methoxybenzene)**

<sup>1</sup>H CDCl<sub>3</sub>

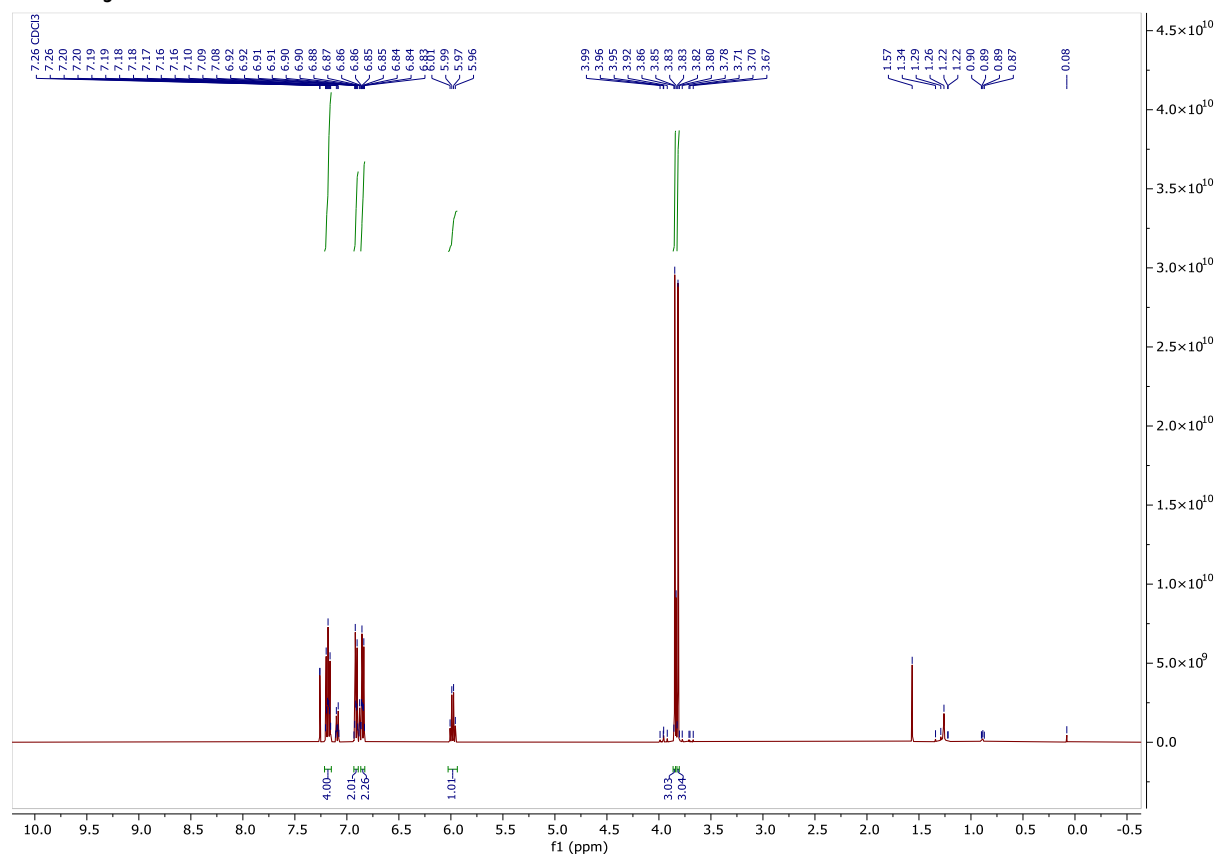

<sup>13</sup>C CDCl<sub>3</sub>

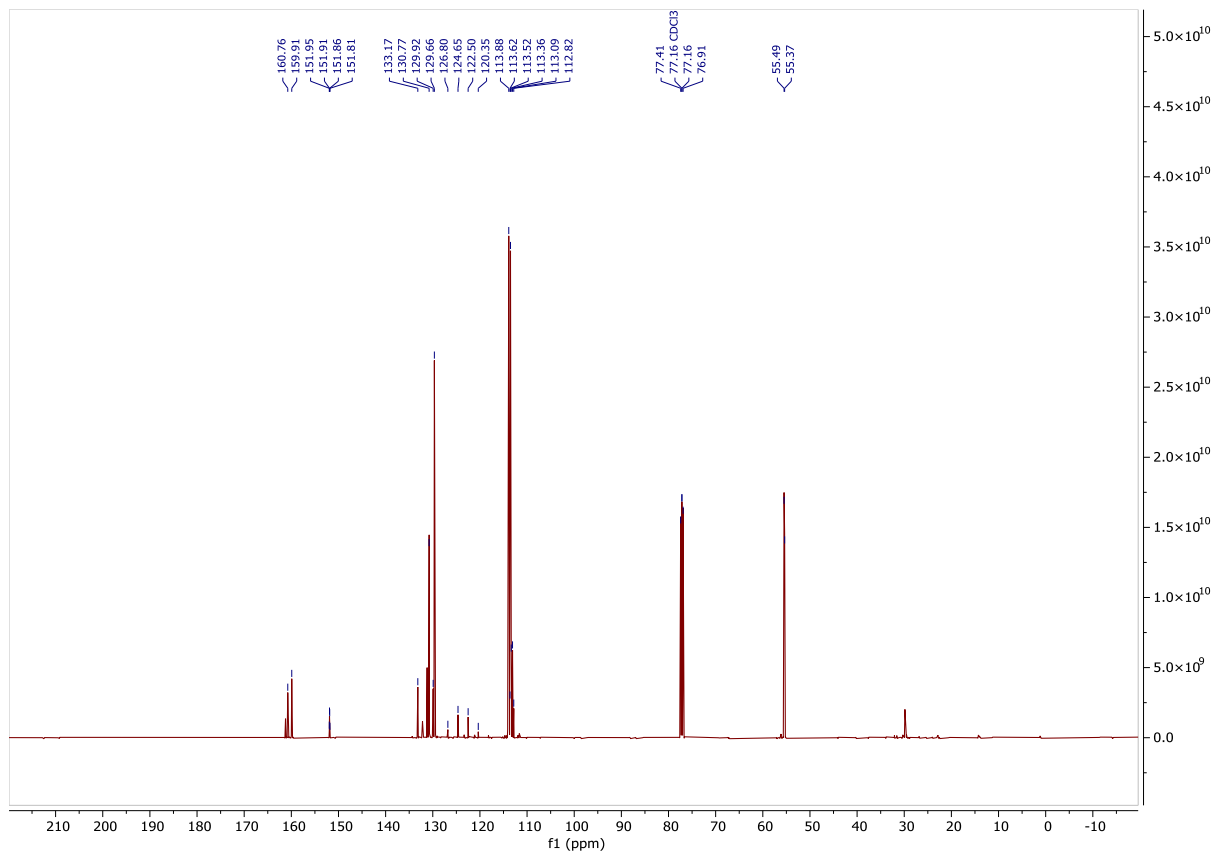

<sup>19</sup>F CDCl<sub>3</sub>

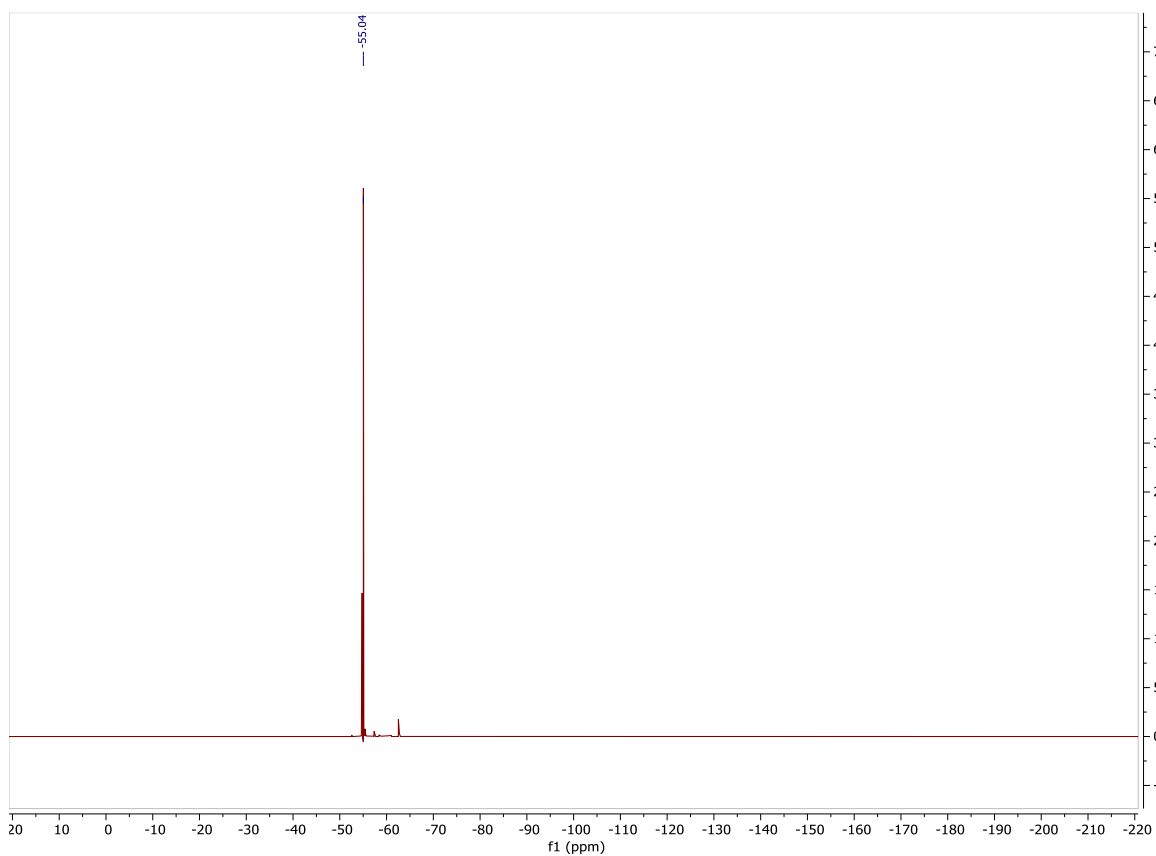

Supplement: d2cc04707a1.pdf [file d2cc04707a1.pdf]
